# Supplementary material for: The whack-a-mole governance challenge for AI-enabled synthetic biology: literature review and emerging frameworks
Source: Front Bioeng Biotechnol. 2024 Feb 28;12:1359768. doi: 10.3389/fbioe.2024.1359768 (PMC10933118; doi:10.3389/fbioe.2024.1359768)
Supplement: Supplementary file 1 [file Table3.XLSX]

## Sheet: Sheet1
Journals	IF	# Papers	Publisher	E	W	MDPI	Ox	S	Pub ctry of HQ	US	UK	G	NL	Sw	C	Sp	Type	SET	SOH	MAN	INT		PubYear	2024	2023	2022	2021	2020	Before 2020
ACS Synthetic Biology	4.7	4	American Chemical Society						USA	1							Science, Engineering & Technology	4
AI & Society	2.6	1	Springer Nature					1	Germany			1					Social science and Humanities		1
Artificial Intelligence in Medicine	7.05	1	Elsevier						The Netherlands				1				Science, Engineering & Technology	1
Artificial Life	2.6	2	MIT Press						USA	1							Interdisciplinary				2							1
Biodesign Research	n/a	2	Science Partner Journals (SPJ)						USA	1							Science, Engineering & Technology	2
Bioinspiration & Biomimetics	3.4	1	IOP Publishing						UK		1						Science, Engineering & Technology	1
Biomimetics	4.5	1	MDPI			1			Switzerland					1			Science, Engineering & Technology	1
BMC Biology	5.4	1	Springer Nature					1	Germany			1					Science, Engineering & Technology	1											1
Biotechnology & Biotechnological Equipment	1.8	1	Taylor & Francis						UK		1						Science, Engineering & Technology	1
Briefings in Bioinformatics	13.99	5	Oxford Academic				1		UK		1						Science, Engineering & Technology	5							2
Business Strategy and Development	0.57	1	Wiley		1				USA	1							Management			1						1
Cell	66.85	1	Elsevier	1					The Netherlands				1				Science, Engineering & Technology	1
Cell Reports Medicine	16.988	1	Elsevier	1					The Netherlands				1				Science, Engineering & Technology
Cell Reports Physical Science	7.832	1	Elsevier	1					The Netherlands				1				Science, Engineering & Technology	1
Chembiochem	3.461	1	Wiley		1				USA	1							Science, Engineering & Technology	1
Chinese Journal of Chemical Engineering	3.898	1	Elsevier	1					The Netherlands				1				Science, Engineering & Technology	1							1
Communications medicine	n/a	1	Springer Nature					1	Germany			1					Science, Engineering & Technology	1
Communications of the ACM	14.065	1	Association for Computing Machinery (ACM						USA	1							Science, Engineering & Technology	1
Critical Reviews in Biotechnology	9.062	1	Taylor & Francis						UK		1						Interdisciplinary				1
Critical reviews in food science and nutrition	10.2	1	Taylor & Francis						UK		1						Science, Engineering & Technology	1
Current Anthropology	3.226	1	The University of Chicago Press						USA	1							Social science and Humanities		1
Current opinion in Biotechnology	10.279	2	Springer Nature					1	Germany			1					Science, Engineering & Technology	2											1
Current Opinion in Environmental Sustainability	7.964	1	Springer Nature					1	Germany			1					Interdisciplinary				1
Current Opinion in Microbiology	5.4	1	Springer Nature					1	Germany			1					Science, Engineering & Technology	1
Current Opinion in Systems Biology	3.7	1	Springer Nature					1	Germany			1					Science, Engineering & Technology	1							1
Current topics in biotechnology and Immunology	BOOK	1	Springer Nature					1	Germany			1					Science, Engineering & Technology	1
Drug Discovery Today	7.4	1	Springer Nature					1	Germany			1					Science, Engineering & Technology	1
eBioMedicine	11.2	1	Elsevier	1					The Netherlands				1				Science, Engineering & Technology	1
Embo Reports	8.8	3	Springer Nature					1	Germany			1					Interdisciplinary				3							1
Emerging topics in life sciences	3.8	2	Portland Press (The Biochemical Society)						UK		1						Science, Engineering & Technology	2											1
Engineering Biology	n/a	1	Wiley		1				USA	1							Science, Engineering & Technology	1
Environment Systems & Decisions	0.761	2	Springer Nature					1	Germany			1					Science, Engineering & Technology	2
Environmental Research	8.3	1	Elsevier	1					The Netherlands				1				Science, Engineering & Technology	1
Essays in Biochemistry	6.4	2	Portland Press (The Biochemical Society)						UK		1						Science, Engineering & Technology	2									1
Foundations of Science	1	1	Springer Nature					1	Germany			1					Interdisciplinary				1
Frontiers in Big Data	3.1	1	Frontiers						Switzerland					1			Science, Engineering & Technology	1
Frontiers in Bioengineering and Biotechnology	5.7	7	Frontiers						Switzerland					1			Science, Engineering & Technology	7
Frontiers in Computer Science	2.6	1	Frontiers						Switzerland					1			Science, Engineering & Technology	1
Frontiers in Genetics	3.7	1	Frontiers						Switzerland					1			Science, Engineering & Technology	1
Frontiers in Public Health	5.2	1	Frontiers						Switzerland					1			Social science and Humanities		1
Futures	3	2	Elsevier	1					The Netherlands				1				Interdisciplinary				2
GEN Biotechnology	n/a	1	Mary Ann Liebert, Inc.						USA	1							Science, Engineering & Technology	1
Genes & Development	12.89	1	The Genetics Society.						UK		1						Science, Engineering & Technology	1
Geoforum	3.5	1	Elsevier	1					The Netherlands				1				Social science and Humanities		1						1
Global Environmental Politics	4.8	2	MIT Press						USA	1							Interdisciplinary				2						1	1
Health Security	3.3	3	Mary Ann Liebert, Inc.						USA	1							Interdisciplinary				3
Heliyon	4	1	Elsevier	1					The Netherlands				1				Interdisciplinary				1
Immunological Reviews	10.983	1	Wiley						USA	1							Science, Engineering & Technology	1
Infection, Genetics and Evolution	4.4	1	Elsevier	1					The Netherlands				1				Science, Engineering & Technology	1
Integrative and Comparative Biology	2.6	1	Oxford Academic				1		UK		1						Science, Engineering & Technology	1
International Journal of Molecular Sciences	5.6	3	MDPI			1			Switzerland					1			Science, Engineering & Technology	3										1
iScience	5.08	3	Elsevier	1					The Netherlands				1				Science, Engineering & Technology	3
Issues of Science and Technology	1.649	1	NASEM & Arizona State University						USA	1							Interdisciplinary				1
Journal of Biological Chemistry	5.486	1	ASBM						USA	1							Science, Engineering & Technology	1
Journal of Biological Engineering	1.173	1	Springer Nature					1	Germany			1					Science, Engineering & Technology	1
Journal of Biosafety and Biosecurity	1.4	4	Elsevier	1					The Netherlands				1				Science, Engineering & Technology	4							1
Journal of Business Research	11.3	1	Elsevier	1					The Netherlands				1				Social science and Humanities		1
Journal of Chemical Information and Modeling	5.6	1	ACS Publications						USA	1							Science, Engineering & Technology	1
Journal of Cleaner Production	11.1	2	Elsevier	1					The Netherlands				1				Science, Engineering & Technology	2									1	1
Journal of Environmental Engineering	2.2	1	ASCE						USA	1							Science, Engineering & Technology	1										1
Journal of Industrial Microbiology & Biotechnology	4.258	1	Oxford Academic				1		UK		1						Science, Engineering & Technology	1
Journal of Law and Society	1.3	1	Wiley		1				USA	1							Social science and Humanities		1
Journal of Law and the Biosciences	3.4	1	Oxford Academic				1		UK		1						Social science and Humanities		1
Journal of Responsible Innovation	3.9	2	Taylor & Francis						UK		1						Interdisciplinary				2
Life (Basel)	3.2	1	MDPI			1			Switzerland					1			Science, Engineering & Technology	1
Materials Today Bio	8.2	1	Elsevier	1					The Netherlands				1				Science, Engineering & Technology	1									1
Metabolic Engineering	8.4	1	Elsevier	1					The Netherlands				1				Science, Engineering & Technology	1
Metabolic Engineering Communications	5.2	1	Elsevier	1					The Netherlands				1				Science, Engineering & Technology	1
Molecular Systems Biology	9.9	1	Springer Nature					1	Germany			1					Science, Engineering & Technology	1
Nature	64.8	1	Springer Nature					1	Germany			1					Science, Engineering & Technology	1							1
Nature Aging	16.6	1	Springer Nature					1	Germany			1					Science, Engineering & Technology	1
Nature Communications	16.6	7	Springer Nature					1	Germany			1					Science, Engineering & Technology	7								1
Nature Medicine	82.9	1	Springer Nature					1	Germany			1					Science, Engineering & Technology	1
Nature Reviews Drug Discovery	112.288	1	Springer Nature					1	Germany			1					Science, Engineering & Technology	1
Nature Reviews Materials	76.679	1	Springer Nature					1	Germany			1					Science, Engineering & Technology	1										1
New Biotechnology	5.4	3	Elsevier	1					The Netherlands				1				Science, Engineering & Technology	3							1		1
New Genetics and Society	1.8	1	Taylor & Francis						UK		1						Interdisciplinary				1
NPJ Digital Medicine	15.2	1	Springer Nature					1	Germany			1					Science, Engineering & Technology	1
Nucleic Acids Research	14.9	1	Oxford Academic				1		UK		1						Science, Engineering & Technology	1
PLoS Biology	9.8	1	PloS						USA	1							Science, Engineering & Technology	1
PloS Computational Biology	4.3	2	PloS						USA	1							Science, Engineering & Technology	2
Quantitative Biology	3.1	1	Higher Education Press						China						1		Science, Engineering & Technology	1
Research Policy	7.2	1	Elsevier	1					The Netherlands					1			Interdisciplinary				1
Science	47.728	3	AAAS						USA	1							Science, Engineering & Technology	3
Science China Life Sciences	9.1	2	Springer Nature					1	Germany			1					Science, Engineering & Technology	2
Science, Technology, & Human Values	3.1	3	Sage Publishing						UK		1						Interdisciplinary				3								2
Scientometrics	3.9	1	Springer Nature					1	Germany			1					Interdisciplinary				1
Sensors	3.847	1	MDPI			1			Switzerland					1			Science, Engineering & Technology	1
Signal transduction and targeted therapy	39.3	1	Springer Nature					1	Germany			1					Science, Engineering & Technology	1
Sociologia y Technosciencia	0.41	1	Universidad de Valladolid						Spain							1	Social science and Humanities		1
Soft Robotics	7.9	1	Mary Ann Liebert, Inc.						USA	1							Science, Engineering & Technology	1
Swiss Medical Weekly	4.203	1	SMW						Switzerland					1			Interdisciplinary				1
Synthetic and Systems Biotechnology	4.8	2	Elsevier	1					The Netherlands				1				Science, Engineering & Technology	2
Synthetic Biology (Oxford)	2.533	1	Oxford Academic				1		UK		1						Science, Engineering & Technology	1
Technology in Society	9.2	1	Elsevier	1					The Netherlands				1				Interdisciplinary				1
Technovation	12.5	1	Elsevier	1					The Netherlands				1				Interdisciplinary				1
The American Journal of Bioethics	14.676	1	Taylor & Francis						UK		1						Social science and Humanities		1
The Anthropocene Review	2.8	1	Sage Publishing						UK		1						Interdisciplinary				1
The Journal of Technology Transfer	5.5	1	Springer Nature					1	Germany			1					Interdisciplinary				1
The Nonproliferation Review	0.5	1	Taylor & Francis						UK		1						Interdisciplinary				1
Trends in Biotechnology	17.3	3	Elsevier	1					The Netherlands				1				Science, Engineering & Technology	3							1			1
Technological Forecasting and Social Change	12	1	Elsevier	1					The Netherlands				1				Interdisciplinary				1
Technology Analysis & Strategic Management	3.4	8	Taylor & Francis						UK		1						Management			8							6	1	1
Australian Journal of International Affairs	1.5	1	Taylor & Francis						UK		1						Interdisciplinary				1
Public Understanding of Science	4.1	1	Sage Publishing						UK		1						Interdisciplinary				1
SynBio (MDPI)	n/a	1	MDPI			1			Switzerland					1			Science, Engineering & Technology	1
BioScience	10.1	1	Oxford Academic				1		UK		1						Science, Engineering & Technology	1											1
SLAS Discovery	3.3	1	Elsevier	1					The Netherlands				1				Science, Engineering & Technology	1										1
Risk Analysis	3.8	1	Wiley		1				USA	1							Interdisciplinary				1							1
Advanced Agrochem	n/a	1	Elsevier						The Netherlands				1				Science, Engineering & Technology	1
Journal of Sustainable Agriculture and Environment	n/a	1	Wiley		1				USA	1							Interdisciplinary				1
Biochemistry and Cell Biology
	1084.38
	9.94			25	6	5	7	25		22	23	13	26	12	1	1
	Total	169															Subtotals	114	9	9	36			40		14	11	11	7
