# Supplementary material for: The whack-a-mole governance challenge for AI-enabled synthetic biology: literature review and emerging frameworks
Source: Front Bioeng Biotechnol. 2024 Feb 28;12:1359768. doi: 10.3389/fbioe.2024.1359768 (PMC10933118; doi:10.3389/fbioe.2024.1359768)
Supplement: Supplementary file 3 [file Table1.XLSX]

## Sheet: Raw
	Author(s)	Title	Type	Sector(s)	Keywords
1	(Hagendorff, 2021)	Forbidden knowledge in machine learning reflections on the limits of research and publication	Peer reviewed article		Forbidden knowledge, Machine learning, Artificial intelligence, Governance, Dual-use, Publication norms, open access, precautionary principle, AI ethics
2	(Linkov, Trump, Anklam, et al., 2018)	Comparative, collaborative, and integrative risk governance for emerging technologies	Peer reviewed article		Synthetic biology, Biotechnology, Nanotechnology, Governance, Risk assessment, Policy, Decision analysis, Regulations, key enabling technologies, emerging technologies, risk governance,
3	(Blok and von Schomberg, 2023)	Putting Responsible Research and Innovation into Practice	Book	EU	Responsible Research and Innovation (RRI), Research and Innovation (R & I), disruptive technologies, synthetic biology, artificial intelligence, robotics, science, pandemic, responsible AI, responsible agroecology, Horizon 2020, science and society, civil society, science policy, EU, EU Framework Programme for Research and Innovation
4	(Reynolds, 2021)	Engineering biological diversity: the international governance of synthetic biology, gene drives, and de-extinction for conservation	Peer reviewed article		Biological diversity, governance, synbio governance, gene drives, conservation, international law, national law, self-governance, conservationist synthetic biology, environmental risks, Convention on Biological Diversity (CBD), emerging technologies,
5	(Xiao et al., 2023)	Generative Artificial Intelligence GPT-4 Accelerates Knowledge Mining and Machine Learning for Synthetic Biology	Peer reviewed article		Yarrowia lipolytica; feature selection; human intervention; natural language processing; prompt engineering; transfer learning, information extraction, biomanufacturing, random forest model, machine learning (ML), generative AI, metabolic engineering, synthetic biology
6	(Bray, 2023)	Artificial Intelligence and Synthetic Biology Are Not Harbingers of Doom	Think tank		AI, synthetic biology, benevolence, pathogens, bioterrorism, precursor behaviors, LLMs
7	(Carter et al., 2023)	The Convergence of Artificial Intelligence and the Life Sciences	Think tank		Convergence, AI, synthetic biology, bioscience, bioengineering, AI-bio capabilities, malicious actors, biological catastrophe, biological agents, pathogens, toxins, policy recommendations, AI guardrails, biosecurity, governance
8	(Tong and Zhang, 2023)	Discovering the next decade's synthetic biology research trends with ChatGPT	P		chatGPT, synthetic biology research trends, conversation with chatGPT
9	(Grinbaum and Adomaitis, 2023)	Dual Use Concerns of Generative AI and Large Language Models	preprint		DURC, LLMs, Dual Use Research of Concern (DURC) framework, AI governance, gain-of-function (GOF), public safety, National Security Advisory Board for Biosecurity (NSABB), Fink report, shared responsibility
10	(Yamagata, 2023)	SynBio: A Journal for Advancing Solutions to Global Challenges	Editorial		Synbio, global challenges, synbio applications, AI
11	(Achim and Zhang, 2022)	Exploring the social, ethical, legal, and responsibility dimensions of artificial intelligence for health-a new column in Intelligent Medicine	Peer		Intelligent medicine, AI in medicine, AI in healthcare, AI for health, AI governance, AI systems, ELSI/A, responsible research and innovation (RRI), open science
12	(Li et al., 2023)	ChatGPT in Healthcare: A Taxonomy and Systematic Review		preprint	chatGPT, taxonomy, systematic review, natural language processing (NLP), OpenAI, AI, PubMed, biomedical datasets, medical applications, research gaps, clinical workflow, medical research, medical education, consultation, triage, translation, multimodal
13	(Dixon, Walker and Pretorius, 2023)	Visioning synthetic futures for yeast research within the context of current global techno-political trends			metagenome; minimal genome; pan-genome; supernumerary neochromosome; synthetic communities; synthetic genome, yeast research, techno-political trends, Saccharomyces cerevisiae, AI-enabled tools for the life sciences, applied science, basic science, convergence, synthetic yeast research
14	(Mahesh et al., 2023)	Viable remediation techniques to cleansing wastewaters comprising endocrine-disrupting compounds		peer	Endocrine-disrupting chemicals (EDCs), AI system, synthetic biology, biodegradation, wastewater
15	(Xu et al., 2022)	Bibliometric analysis of artificial intelligence for biotechnology and applied microbiology: Exploring research hotspots and frontiers	United States, Chinese Academy of Science	peer	applied microbiology; artificial intelligence; bibliometric; biotechnology; deep learning; machine learning, disease diagnostics, drug research and development, functional genomics, biomarker recognition, medical imaging diagnostics, Web of Science Core Collection (WoSCC), microRNA, protein-protein interactions (PPIs)
16	(Wu et al., 2022)	Research Trends in the Application of Artificial Intelligence in Oncology: A Bibliometric and Network Visualization Study		China	artificial intelligence; bibliometrics; cancer; deep learning; hotspots, AI in cancer, AI in oncology, AI in radiomics, AI in precision oncology, precision medicine, Science Citation Index Expanded, Scientific Reports, PloS, tissue microarray, tissue segmentation, artificial neural network
17	(Shi et al., 2022)	Data-Driven Synthetic Cell Factories Development for Industrial Biomanufacturing		peer	artificial intelligence (AI), machine learning (ML), artificial cell factories, industrial biomanufacturing, biomanufacturing, cell factories, protein function, non-natural biosynthesis pathways, pathway optimization, synthetic strains
18	(Helmy, Smith and Selvarajoo, 2020)	Systems biology approaches integrated with artificial intelligence for optimized metabolic engineering		peer	Artificial intelligence; Food industry; Machine learning; Metabolic engineering; Systems biology, metabolic pathways, compound libraries, multi-omics, transcriptomics, proteomics, metabolomics, holistic understanding, industrial biotechnology, food-related substances, microorganisms
19	(Hoffmann, 2023)	Designer genes courtesy of artificial intelligence		peer	Drosophila; RNA polymerase II; core promoter; gene expression; transcription, machine learning, statistical learning model
20	(Capponi and Daniels, 2023)	Harnessing the power of artificial intelligence to advance cell therapy		peer	cell signaling; cell therapy; machine learning; signaling motifs; synthetic biology, Artificial intelligence (AI), machine learning (ML), predictive models, experimental approaches, genome annotation, protein structure prediction, modular cell therapy technologies
21	(Y. Zeng et al., 2022)	Advanced genome-editing technologies enable rapid and large-scale generation of genetic variants for strain engineering and synthetic biology		peer	Genome-editing, genetic variants, strain engineering, synthetic biology, CRISPR, RNA-based tools, AI-optimization algorithms, biomanufacturing, biosensing, high-throughput phenotyping, biological engineering
22	(Mervin et al., 2021)	Uncertainty quantification in drug design		peer	Uncertainty quantification, drug design, AI, drug-design, algorithms, autonomous decision-making, chemistry automation, decision-making, molecular de novo generation, synthetic route prediction, property predictions
23	(Yu, Wang and Zheng, 2022)	Uncertainty quantification: Can we trust artificial intelligence in drug discovery?		peer	Applied computing; Artificial intelligence; Drugs, Uncertainty quantification, drug design, human trust, applicability domain, training set, autonomous drug designing
24	(Koskinen, 2020)	Could We Really Be Made of Swiss Cheese? Xenobiology as an Engineering Epistemology for Biological Realization		peer	bioorganic chemistry; multiple realizability; philosophy of science; synthetic biology; xenobiology, digital minds
25	(Martin et al., 2023)	Perspectives for self-driving labs in synthetic biology		peer	self-driving labs (SDLs), synthetic biology,
26	(Lawrence, 2019)	Advanced bioscience and AI: debugging the future of life		peer	AI, homo sapiens, sapient beings, sapient AIs, artificial intelligence; bioethics; new life; personhood; synthetic biology
27	(Ebrahimkhani and Levin, 2021)	Synthetic living machines: A new window on life		peer	bioengineering; developmental biology; synthetic biology, synthetic living machines, molecular genetics, morphogenesis, synthetic morphogenesis, meso-scale morpogenesis, self-assembly, emergent self-organization, synthetic anatomies, evolutionary cell biology
28	(Bongard and Levin, 2023)	There's Plenty of Room Right Here: Biological Systems as Evolved, Overloaded, Multi-Scale Machines		peer	artificial intelligence; artificial life; biology; computer science; evolution; machine learning; robot, biomimetics, biological systems, multi-scale machines, intelligent machines, physical computing, polycomputing, overloading, regenerative medicine
29	(Blackiston et al., 2023)	Biological Robots: Perspectives on an Emerging Interdisciplinary Field		peer	animal cap; biorobot; computer science; developmental biology; embryo; robot; synthetic bioengineering; xenobot, regenerative medicine, synthetic living machines
30	(Webster-Wood et al., 2022)	Biohybrid robots: recent progress, challenges, and perspectives		peer	biohybrid; cyborg; living machines, biohybrid robotics, microorganism bots, sperm-bots, tissue-based robots, autonomous living machines
31	(Li et al., 2022)	An Account of Models of Molecular Circuits for Associative Learning with Reinforcement Effect and Forced Dissociation		peer	associative learning, molecular circuits, synthetic biology, mathematical modelling, Hill equation, Pavlov’s dog, reinforcement, dissociation, nondimensionalisation
32	(Nesbeth et al., 2016)	Synthetic biology routes to bio-artificial intelligence		peer	artificial intelligence, gene networks, synthetic biological circuits, synthetic biology, bio-artificial intelligence (BI)
33	(Kumar, Sinha and Shukla, 2022)	Artificial intelligence and synthetic biology approaches for human gut microbiome		peer	Artificial intelligence; CRISPR-Cas; gut microbiome; nutraceutical; probiotics; synthetic biology, assisted synthetic biology, Clustered Regularly Interspaced Short Palindromic Repeats (CRISPR-Cas)
34	(Wong, de la Fuente-Nunez and Collins, 2023)	Leveraging artificial intelligence in the fight against infectious diseases		peer	AI, infectious disease, pathogen, synthetic biology, anti-infective drug discovery. Reverse vaccinology, epidemiology, explainable ML, infection biology, pandemics, antimicrobial resistance
35	(Zhang et al., 2023)	Enabling technology and core theory of synthetic biology		peer	synthetic biology, quantitative synthetic biology, genome synthesis and assembly, DNA storage, molecular evolution, de novo design, computer-aided design, cell engineering, gene circuit, chassis cell, artificial intelligent (AI), Biofoundry, cell-free synthetic biology
36	(Nelson et al., 2021)	Foresight in Synthetic Biology and Biotechnology Threats		Book chapter	Foresight, biothreats, synthetic biology, risk landscape, risk mitigation, NATO
37	(Endy, 2005)	Foundations for engineering biology		peer	Synthetic biology, engineered biological systems, foundational technologies, open science, standardization, biorisks, biological risks
38	(Alexander Hamilton et al., 2021)	Opportunities, Challenges, and Future Considerations for Top-Down Governance for Biosecurity and Synthetic Biology			Biosecurity, synthetic biology, top-down governance, laissez-faire governance, stewardship governance, bioeconomy
39	(Kahl and Endy, 2013)	A survey of enabling technologies in synthetic biology			Synthetic biology, Biological engineering, Enabling technologies, Survey, Intellectual property rights, Licensing, Regulation
40	(Holzinger et al., 2023)	AI for life: Trends in artificial intelligence for biotechnology		Editorial	Artificial Intelligence, Biotechnology, Deep Learning, Digital Transformation, Machine Learning, drug discovery, drug safety, functional and structural genomics, proteomics, metabolomics, pharmacology, pharmacogenetics, and pharmacogenomics, agricultural biotechnology, AI in forest biotechnology, AI in medical biotechnology, AI in Animal biotechnology, AI in bioinformatics, trustworthy AI, AI met…
44	(O’Brien and Nelson, 2020)	Assessing the Risks Posed by the Convergence of Artificial Intelligence and Biotechnology			Risk assessment, Artificial intelligence, Biotechnology, Biosecurity, NASEM Framework, Tucker Framework, synthetic biology, vulnerabilities, deep learning, precision maladies, pathogens, engineered pathogens, AI systems, AAAS-FBI-UNICRI Framework, Tucker-Koblentz framework, biosecurity
41	(A Dixon, C Curach and Pretorius, 2020)	Bio-informational futures The convergence of artificial intelligence and synthetic biology			Biofoundries, AI, synthetic biology, technology platforms, policy problems, bio-informational future, future, genome foundries, modular laboratory equipment, MIT Foundry, Gingko Bioworks, Amyris, the London Biofoundry, biological devices, productivity, Global Biofoundries Alliance (GBA)
42	(Hillson et al., 2019)	Building a global alliance of biofoundries			Metabolic engineering, Synthetic biology, AI, automation, workflows, tools, Design-Build-Test-Learn (DTBL), machine learning, testing, large-scale genetic designs, biomedical applications, biodesign rules, reprogramming living cells, complexity of living systems, product prototyping, commercial process validation, biomanufacturing, process engineering, high-throughput equipment
43	(Oliveira and Densmore, 2022)	Hardware, Software, and Wetware Codesign Environment for Synthetic Biology			Synthetic biology, wetware codesign, biodesign automation, genetic circuits, engineered genetic circuits, AI, software, engineering framework, synthetic biological systems, DNA biofoundries, cloud laboratories, standards
44	(Kitano et al., 2023)	Synthetic biology: Learning the way toward high-precision biological design			Synthetic biology, machine learning, genetics, human genomics, synthetic genomics, bioengineering, biologists, DNA synthesis, biomanufacturing, design-build-test-learn (DBTL) cycle
45	(Damiano and Stano, 2023)	Explorative Synthetic Biology in AI: Criteria of Relevance and a Taxonomy for Synthetic Models of Living and Cognitive Process			Artificial intelligence, synthetic biology, epistemology of synthetic models, taxonomy of synthetic models, synthetic method, criteria of relevance
46	(Eslami et al., 2022)	Artificial intelligence for synthetic biology		peer	AI, applied computing, computational biology, computing methodologies, life and medical sciences, metabolic engineering, experiment automation, multimodality, design on living cells
47	(Ataii et al., 2023)	Enabling AI in Synthetic Biology through Construction File Specification			Construction File (CF) specification, Python, ChatGPT, GPT-4, modularization, automation, collaboration, synthetic biology, AI, AI-assisted workflows, human-driven design
48	(DiEuliis et al., 2019)	Does Biotechnology Pose New Catastrophic Risks?		Chapter	Biotechnology, catastrophic risks, synthetic biology, biosecurity, genetic engineering, dual-use capabilities, tools, preparedness, emerging technologies, viral genomes, recreating pathogens, resurrecting extinct species, infectious disease, biosurveillance, bioagents, bioweapons
49	(Mampuys and Brom, 2018)	Emerging crossover technologies: How to organize a biotechnology that becomes mainstream?			Biotechnology, Emerging technologies, Synthetic biology, Regulations, Europe
50	(Murashov, Howard and Schulte, 2020)	Synthetic Biology Industry: Biosafety Risks to Workers		Chapter	Biosafety risks, workers, synthetic biology industry, manufacturing, biomanufacturing, biotechnology sector, USA, US economy, bioethics, risk mitigation, health surveillance, proactive risk management, prevention-through-design principles, dynamic guidance, adverse health effects, NIOSH, emerging technologies
51	(Pio-Lopez, 2021)	The rise of the biocyborg: synthetic biology, artificial chimerism and human enhancement			Biopolitics, biocyborg, synthetic biology, human enhancement, gene editing, self-experimentation, biohacking, cyborg, chimerism, bioeconomy, human being, human species, hybridity, social practices, implantables, active medical devices, non-Darwinian human evolution
52	(Hanson and Lorenzo, 2023)	Synthetic Biology─High Time to Deliver?		peer	Bacteria, Bioengineering and biotechnology, Biotechnology, Circuits, Genetics, critique, biologization, practical solutions, real-world problems, synbio hype, tools, bioeconomy, industrialization , overspecialization, optimization, biofoundry
53	(Wang and Zhang, 2019)	Synthetic biology: Recent progress, biosafety and biosecurity concerns, and possible solutions			Synthetic biology, Biosafety, Biosecurity, Ethics, Genetic firewall, Genetic safeguard, Code of conduct, Governance regulation, iGEM, international genetically engineered machine competition, Biological and Toxin Weapons Convention (BWC)
54	(Li et al., 2021)	Advances in Synthetic Biology and Biosafety Governance			synthetic biology, artificial life, biosafety, regulation and legislation, public health emergency response system, pandemic control strategies. Governance, biological risks, biorisks, food security, ecological sustainability, industrialization, pathogens, biosafety governance, biosecurity, USA, FDCA, CDC, NIH, DURC, pandemics, control
55	(Trump et al., 2022)	Governing biotechnology to provide safety and security and address ethical, legal, and social implications			biotechnology, ELSI, policy, governance, safety-by-design, synthetic biology, ethical, legal, and social implications, risk, AI, technology modernization, technology advancement
56	(Sundaram, Ajioka and Molloy, 2023)	Synthetic biology regulation in Europe: containment, release and beyond			regulation, EU, synthetic biology, biotechnology, containment, genetic engineering, regulatory frameworks, bioengineering, GM, GMO regulation, biosensor, synbio products, risk assessments
57	(Trump et al., 2019)	Co-evolution of physical and social sciences in synthetic biology		peer	Synthetic biology, risk, governance, review, policy
58	(Vallejos-Romero et al., 2021)	Social sciences, risks and synthetic biology: A review of the literature		peer	synthetic biology, risks, regulation, governance, controversies
59	(Sarkar et al., 2023)	Artificial Intelligence and Machine Learning Technology Driven Modern Drug Discovery and Development			artificial intelligence; machine learning; drug discovery; virtual screening; QSAR; QSPR; algorithms; neural networks
60	(Jafari et al., 2023)	Merging machine learning and bioelectronics for closed-loop control of biological systems and homeostasis			Machine learning, bioelectronics, artificial technology, biological systems, bioelectrics, sensor data, actuator data, biological system responses
61	(Vaseashta, 2023)	Existential Risks Associated with Dual-Use Technologies			dual-use technologies, catastrophic risk, existential risk, threat intelligence, nanobiotechnology
62	(Stano, 2023)	Chemical Systems for Wetware Artificial Life: Selected Perspectives in Synthetic Cell Research			artificial cells; artificial intelligence; artificial life; autopoiesis; chemical AI; cognition; synthetic biology; synthetic cells; semantic information; systems chemistry
63	(Qiu and Wei, 2023)	Artificial intelligence-aided protein engineering: from topological data analysis to deep protein language models			topological data analysis, protein language models, protein engineering, deep learning and machine learning, ML, NLP, AI
64	(‘Generating “smarter” biotechnology’, 2023)	Generating ‘smarter’ biotechnology			Generative AI, biotechnology,
65	(Getz and Dellaire, 2018)	Angels and Devils: Dilemmas in Dual-Use Biotechnology			dual use, dual-use policy CRISPR/Cas9, research of concern, ethics education, synthetic virology, gene-drive technology, human gene editing
66	(J. B. Sandbrink, 2023)	Artificial intelligence and biological misuse: Differentiating risks of language models and biological design tools			DURC, LLMs, GPT-4, AI, biological misuse, risk, biorisk, biological design tools (BDTs),
67	(Soice et al., 2023)	Can large language models democratize access to dual-use biotechnology?			LLMs, dual-use, democratized access, reverse genetics, DNA synthesis, LLM chatbots, robotic cloud laboratories, MIT, pandemic-class agents
68	(D’Alessandro, Lloyd and Sharadin, 2023)	Large Language Models and Biorisk		Commentary	Biorisk, LLMs, ML, AI, ML model misuse, dangerous bioagents, lab security measures, biomedical ML systems, bad actors, biomedical AI assistants, toxic compounds, mass misinformation campaigns, prompt engineering, online misinformation, machine-generated examples, red-teaming, sandboxed environments, BSL requirements, biosecurity safety level (BSL), information security
69	(Urbina et al., 2022)	Dual use of artificial-intelligence-powered drug discovery		Comment	Dual use, AI, drug discovery, toxic molecules
70	(Mökander et al., 2022)	Challenges and best practices in corporate AI governance: Lessons from the biopharmaceutical industry			artificial intelligence; AstraZeneca, case study; ethics; governance; implementation; lessons learned; practice
71	(de Pedraza and Vollbracht, 2023)	General theory of data, artificial intelligence and governance			Economics; Science, technology and society
72	(Djeffal, Siewert and Wurster, 2022)	Role of the state and responsibility in governing artificial intelligence: a comparative analysis of AI strategies	22 countries; EU		Artificial intelligence; AI governance; policy instruments; state types; responsible research innovation; technology assessment
73	(Xu, 2023)	ChatGPT opens a new door for bioinformatics			chatGPT, bioinformatics, alignment, literature mining, data analysis, method development, classroom, lifelong learning
74	(Luo et al., 2022)	BioGPT: generative pre-trained transformer for biomedical text generation and mining			biomedical literature, generative pre-trained language model, text generation, text mining, problem solving protocol, BioGPT
75	(Jin et al., 2023)	GeneGPT: Augmenting Large Language Models with Domain Tools for Improved Access to Biomedical Information		preprint	GeneGPT, augmentation, LLMs, biomedical information,
76	(Clusmann et al., 2023)	The future landscape of large language models in medicine			Computational biology and bioinformatics, Health services, Medical research, Public health, LLMs, Large language models (LLMs), OpenAI, ChatGPT, patient care, medical knowledge
77	(Taylor et al., 2023)	Intrinsic responsible innovation in a synthetic biology research project			Responsible Innovation, synthetic biology, interdisciplinarity, biocontainment, antibiotic resistance, lab escape, lab constructed genetic material
78	(Tarasava, 2023)	How AI Is Transforming Synthetic Biology: Reaching Far Beyond Biopharma			Synthetic biology, biopharma, generative AI, protein structure prediction, molecular docking, enzyme design, protein design, gene expression optimization, workflow optimization, fermentation technology, fermentation scale-up, biosecurity
79	(Aparicio, 2021)	‘That would break the containment’: the co-production of responsibility and safety-by-design in xenobiology			Technology of compliance, responsible research and innovation, ethics of synthetic biology, xenobiology, governance of emerging technologies, Responsible Research and Innovation (RRI), synthetic biology, public expectations, ethnography, interview data
80	(Bianchini, 2023)	A New Definition of “Artificial” for Two Artificial Sciences			Artificial intelligence, Synthetic biology, Artificial-natural, Biology, Synthetic method, engineering, epistemology
81	(Yeo and Selvarajoo, 2022)	Machine learning alternative to systems biology should not solely depend on data			mechanistic modeling, machine learning, AI, systems biology, synthetic biology, metabolic engineering
82	(Zampieri et al., 2019)	Machine and deep learning meet genome-scale metabolic modeling			Machine learning, Metabolic networks, Machine learning algorithms, Cell metabolism, Principal component analysis, Gene expression, Genomics, Metabolic pathways
83	(Hassoun et al., 2022)	Artificial Intelligence for Biology			AI, biology, artificial intelligence, reintegration, statistics, computational scientists, vision, challenges, barriers, fragmentation of biology
84	(Carbonell, Radivojevic and García Martín, 2019)	Opportunities at the Intersection of Synthetic Biology, Machine Learning, and Automation		viewpoint	Algorithms,Biology,Genetics,Machine learning,Synthetic biology
85	(Heyndrickx et al., 2023)	MELLODDY: Cross-pharma Federated Learning at Unprecedented Scale Unlocks Benefits in QSAR without Compromising Proprietary Information			Federated learning, MELLODY, pharma, crosspharma datasets, pharmacodynamics, pharmacokinetics, Quantitative Structure Activity Relationship (QSAR) models, machine learning, ML
86	(Cubillos-Ruiz et al., 2021)	Engineering living therapeutics with synthetic biology			Synthetic biology, living therapeutics, biologics, genetically engineered cells, synthetic gene circuits, biomarkers, biological sensing, engineered cell, therapeutic function, human diseases, diseases
87	(Wong et al., 2023)	Discovering small-molecule senolytics with deep neural networks			Ageing, Computer modelling, Drug discovery, Machine learning, Senescence, bioinformatics,
88	(Qureshi et al., 2023)	AI in drug discovery and its clinical relevance			Artificial intelligence, Biotechnology, Graph neural networks, Molecule representation, Reinforcement learning, Drug discovery, Molecular dynamics simulation
89	(Yan et al., 2023)	Applications of synthetic biology in medical and pharmaceutical fields			Biotechnology, nanobiotechnology, biocircuits, standardized biological building blocks, synthetic biology, engineered cells, synthetic DNA circuits, biomedical applications, optogenetics, engineered live therapeutics, artificial intelligence, AI,
90	(Patel et al., 2009)	The coming of age of artificial intelligence in medicine			Artificial intelligence in medicine, history, Research challenges, Barriers to success, Sociocultural and cognitive factors, AI
91	(Damiano, Kuruma and Stano, 2016)	What can synthetic biology offer to artificial intelligence (and vice versa)?		Editorial	Synthetic biology, AI
92	(Zhao, 2022)	Synthetic Biology 2.0: The Dawn of a New Era		Editorial	Synthetic biology, AI, automation, bioeconomy
93	(El Karoui, Hoyos-Flight and Fletcher, 2019)	Future Trends in Synthetic Biology—A Report			synthetic biology, biosystem, future trends and developments, biodesign automation, responsible research and innovation (RRI)
94	(Voigt, 2020)	Synthetic biology 2020–2030: six commercially-available products that are changing our world			Synthetic biology, transformation, future, futurist, foresight, products, fermentation, systems, cells as products, engineered biology
95	(Radivojević et al., 2020)	A machine learning Automated Recommendation Tool for synthetic biology			Bayesian inference, Machine learning, Metabolic engineering, Synthetic biology, Automated Recommendation Tool (ART)
96	(Zhang et al., 2023)	Enabling technology and core theory of synthetic biology			Quantitative synthetic biology, AI, biofoundries, DNA storage, gene editing
97	(Watters and Lemanski, 2023)	Universal skepticism of ChatGPT: a review of early literature on chat generative pre-trained transformer			ChatGPT, large language model (LLM), transformer, GPT, disruptive technology, artificial intelligence, AI, disciplines, healthcare
98	(Lubiana et al., 2023)	Ten quick tips for harnessing the power of ChatGPT in computational biology			chatGPT, computational biology, tips, tool, cleanup data, engineer prompts, summarization, AI tools
99	(Ray, 2023)	ChatGPT: A comprehensive review on background, applications, key challenges, bias, ethics, limitations and future scope			ChatGPT, Language modelGPT-3.5, Generative AI, Conversational AI, Context understanding, Natural language processing
100	(Harrer, 2023)	Attention is not all you need: the complicated case of ethically using large language models in healthcare and medicine			Generative artificial intelligence, Large language models, Foundation models, AI ethics, Augmented human intelligence, Information management, AI trustworthiness
101	(Morris, 2023)	Scientists’ Perspectives on the Potential for Generative AI in their Fields		preprint	Generative AI, science, scientists, scientific findings, augmentation, concerns, literature review, coding, discovery, communication, mitigation, negative side-effects, intentional misappropriation
102	(Kather et al., 2022)	Medical domain knowledge in domain-agnostic generative AI			Biomedical engineering, Data integration, Machine learning
103	(Xiangxiang Zeng et al., 2022)	Deep generative molecular design reshapes drug discovery			Generative models, AI, drug discovery, drug development challenges, multimodal deep generative models
104	(Bhardwaj, Kishore and Pandey, 2022)	Artificial Intelligence in Biological Sciences			artificial intelligence, biotechnology, agriculture, medicine, crop yield, life science, metabolic pathways, bio-based industrial setup, bio-based industry, bioengineering
105	(Topol, 2019)	High-performance medicine: the convergence of human and artificial intelligence			Health care, machine learning, AI, human intelligence, artificial intelligence, AI in life science, genomics, multi-omics datasets,
106	(Camacho et al., 2018)	Next-Generation Machine Learning for Biological Networks			Machine learning, deep learning, systems biology, synthetic biology, network biology, neural networks, biological networks, microbiome research, disease biology, gene circuits, synthetic gene circuits, synthetic circuit, biomedical applications, fundamental design principles, synthetic gene networks
107	(Mökander et al., 2022)	Challenges and best practices in corporate AI governance: Lessons from the biopharmaceutical industry			artificial intelligence, AstraZeneca, case study, ethics, governance, implementation, lessons learned, practice
108	(Edwards, 2014)	Taking Stock of Security Concerns Related to Synthetic Biology in an Age of Responsible Innovation			synthetic biology, biosafety, biosecurity, ethics, dual-use, public health, policy, ethical, legal, and social issue (ELSI), responsible innovation , dual-use research of concern (DURC)
109	(Lev, 2019)	Regulating dual-use research: Lessons from Israel and the United States			Dual-use, dual-use research of concern (DURC). Legislation, Israel, USA, China, policy
110	(Xiaomei Zeng et al., 2022)	Regulation and management of the biosecurity for synthetic biology			Synthetic biology, Biosecurity risk, Regulation and management, Source, Suggestion, synbio, biosafety, biosecurity, GMO, China, risk assessment, standard, biosafety standards, labs
111	(Ienca and Vayena, 2018)	Dual use in the 21st century: emerging risks and global governance			dual-use research of concern (DURC), global governance, decentralized governance architectures, bottom-up strategies, WHO
112	(Palmer, Fukuyama and Relman, 2015)	A more systematic approach to biological risk			Biological risk, life science, Asilomar, U.S. biosafety, policy, regulation, gain-of-function, viral pathogens, gene drives, security risks
113	(Pannu et al., 2022)	Strengthen oversight of risky research on pathogens			Pathogens, oversight, governance, policy reset, convergence, DURC, dual-use research of concern (DURC)
114	(Cho and Relman, 2010)	Synthetic “Life,” Ethics, National Security, and Public Discourse			Synthetic life, artificial life, national security, public discourse, synthetic biology, risks, U.S. National Science Advisory Board for Biosecurity (NSABB)
115	(Sun et al., 2022)	Challenges and recent progress in the governance of biosecurity risks in the era of synthetic biology			Synthetic biology, Biosecurity, Risk management, Governance systems, International collaboration, aggravation of species with complex gene modifications, threats to species diversity, abuse of biological weapons, laboratory leaks, and man-made mutations, China
116	(J. Sandbrink, 2023)	Panoptic dual-use management: preventing deliberate pandemics in an age of synthetic biology and artificial intelligence		Ph.D thesis	Dual-use, pandemics, synthetic biology, artificial intelligence, LLMs, gene therapy, wildlife virus discovery, viral engineering for vaccine design, viral engineering for gene therapy, management of dual-use virological research, mitigation regimes, tiered dual-use scores
117	(Evans, , 2022)	When All Research Is Dual Use			Biosecurity, threats, social context, machine intelligence, AI, biological weapons, compliance, dual use, dual use research, security governance, pathogens, curiosity-based system
118	(Tang et al., 2023)	Synthetic biology and governance research in China: a 40-year evolution			Synthetic biology, Biosafety, Biosecurity, Structural topic model, Governance of emerging technologies, synbio, China, safety research, policy implications, synbio safety
119	(Pei, Garfinkel and Schmidt, 2022)	Bottlenecks and opportunities for synthetic biology biosafety standards			Bioremediation, Environmental biotechnology, Synthetic biology, standards, biosafety, standardization, biosafety standardization, biosecurity, biocontainment
120	(Ou and Guo, 2023)	Safety risks and ethical governance of biomedical applications of synthetic biology			synthetic biology, participant safety, biosafety risks, biosecurity risks, ethical governance, public policy, biomedicine, China
121	(Millett et al., 2020)	The synthetic-biology challenges for biosecurity: examples from iGEM			Biosecurity, synthetic biology, education, Australia Group, export controls, dual use, biological engineering, International Genetically Engineered Machine competition (iGEM), iGEM, biosecurity procedures
122	(Trump et al., 2020)	Building biosecurity for synthetic biology			Biosecurity, synthetic biology, bioterrorism, non-state actors, potential misusers, non-state organizations, bioweapons, anthrax, botulinum toxin, oversight, security
123	(Gronvall, 2018)	Safety, security, and serving the public interest in synthetic biology			Synthetic Biology, Technical Expertise Required, National Science Advisory Board For Biosecurity (NSABB), Biological Weapons Development, Hazardous Biological Materials, biosafety, toxins, policy, safety, security, public interest
124	(Schaefer et al., 2023)	Large language models are universal biomedical simulators		preprint	large language models (LLMs), GPT-4, SimulateGPT, biomedical applications, biological simulators, complex living systems
125	(Nguyen et al., 2023)	Bioengineering of bacteria for cancer immunotherapy			Cancer, Cancer microenvironment, Cancer prevention, synbio, bioengineering, synthetic biology, immunotherapy, drug development, BCiT, genetic engineering, genetic circuits, bacteria-based cancer immunotherapy (BCiT), bacteria, S. typhimurium, E. coli
126	(Millett and Alexanian, 2021)	Implementing adaptive risk management for synthetic biology: Lessons from iGEM's safety and security programme			adaptive risk management, biosafety, biosecurity, emerging technology, iGEM, reflexive risk management, risk management, synthetic biology
125	(Beeckman and Rüdelsheim, 2020)	Biosafety and Biosecurity in Containment: A Regulatory Overview			biosafety, biosecurity, biological material, biological agent, containment, regulations, (bio)risk assessment
126	(Linkov, Trump, Poinsatte-Jones, et al., 2018)	Governance Strategies for a Sustainable Digital World			digital revolution; sustainability challenges; governance strategies, laissez-faire, industry-driven approach, precautionary approach, preemptive strategy, stewardship
127	(Keiper and Atanassova, 2020)	Regulation of Synthetic Biology: Developments Under the Convention on Biological Diversity and Its Protocols			synthetic biology, living modified organisms, Cartagena Protocol on Biosafety, Nagoya Protocol on Access and Benefit Sharing, risk assessment, gene drives, digital sequence information, biotechnology regulation
128	(Tebeje, Tadesse and Mengesha, 2021)	Synthetic bio/techno/logy and its application			Synthetic genomics, synthetic biology, genome minimization, bottom-up, top-dow
129	(Perrakis and Sixma, 2021)	AI revolutions in biology			AI revolutions, biology, protein folding, AlphaFold, structural biology, experimental structural biology, protein fold predictions, DeepMind, European Bioinformatics Institute (EBI), RoseTTAfold, deep learning, AI, experiments, AI dependence, AI in science, drug discovery
130	(Seydel, 2023)	DNA writing technologies moving toward synthetic genomes		News	DNA synthesis, synthetic genomes, biosecurity, biomanufacturing, designer genes, regulation, business models, design-build-test cycle
131	(Hoffmann et al., 2023)	Safety by design: Biosafety and biosecurity in the age of synthetic genomics			Biological sciences, Systems biology, Genomics, safety by design, biosafety, biosecurity, synthetic genomics, bioeconomy, regulatory frameworks, technology frameworks, risks, technology readiness levels, synthetic DNA, synthetic DNA of concerns, sequence screening, genetic biocontainment systems, environmental proliferation, DNA synthesis, synthetic yeast, synthetic eukaryotic genome, designer ge…
132	(Rudolph et al., 2023)	Strategies to identify and edit improvements in synthetic genome segments episomally			Synthetic biology, bioengineering, synthetic genome, gene editing, bacterial artificial chromosomes (BACs), multiplex automated genome engineering (MAGE)
133	(Hınçer et al., 2023)	Making the Next Generation of Therapeutics: mRNA Meets Synthetic Biology			mRNA-based therapeutics, mRNA vaccines, synthetic biology, self-assembled nanoparticles, logic gates
134	(Beardall, Stan and Dunlop, 2022)	Deep Learning Concepts and Applications for Synthetic Biology			mRNA-based therapeutics, mRNA vaccines, synthetic biology, self-assembled nanoparticles, logic gates
135	(Belda et al., 2021)	Seeding the idea of encapsulating a representative synthetic metagenome in a single yeast cell			Microbial ecology, Synthetic biology, designer yeasts,
136	(Dixon and Pretorius, 2020)	Drawing on the Past to Shape the Future of Synthetic Yeast Research			Synthetic yeast, biodesign; biodiversity; biofoundry; consilience; engineering biology; fermentation; scientific method; synthetic genomics; timeline; yeast, foresight, history of science, world’ greatest challenges
137	(Wani et al., 2022)	Metagenomics and artificial intelligence in the context of human health			Microbiome, Metagenomics, Artificial intelligence, Human health, Diseases
138	(Wang et al., 2023)	Ethical and social insights into synthetic biology: predicting research fronts in the post-COVID-19 era			synthetic biology, social sciences, bioethical concerns, playing God, biosecurity, biosafety, governance, stakeholders,
139	(Hammang, 2023)	Troubleshooting: The Automation of Synthetic Biology and the Labor of Technological Futures			Automation, synthetic biology, work of the future, future of work, technological futures, Science and technology studies, STS, skilled work, troubleshooting, temporality, laboratory work, interviews, laboratory technicians, ethnography, efficiency, digital infrastructure, robotic infrastructure, workflow, innovation, quality control, maintenance
140	(Zhao et al., 2023)	Synthetic biology-inspired cell engineering in diagnosis, treatment, and drug development			Biomarkers, Cancer, Drug delivery, Genetic engineering, machine learning, computational biology
141	(Pansera et al., 2020)	Embedding responsible innovation within synthetic biology research and innovation: insights from a UK multi-disciplinary research centre			Responsible research and innovation, RI, research governance, synthetic biology, public engagement, UK, reflexivity, RI institutionalization
142	(Shapira, Kwon and Youtie, 2017)	Tracking the emergence of synthetic biology			Emerging technology, Synthetic biology, Bibliometric analysis, Search strategy, Map of science, Research sponsors
143	(Nylund et al., 2022)	The emergence of entrepreneurial ecosystems based on enabling technologies: Evidence from synthetic biology			Entrepreneurial ecosystems, Ecosystem emergence, Complex adaptive systems, Enabling technologies, Synthetic biology
144	(Hamlyn, 2022)	Synthesize this: integrating innovation governance and EU regulation of synthetic biology			Synthetic biology, innovation governance, EU, science and technology studies (STS), Responsible innovation (RI), synbio , governance continuum, participatory governance
145	(Lee and George, 2023)	Future worldbuilding with synthetic biology: A case study in interdisciplinary scenario visualization			Biodesign, Design fiction, Futures studies, Scenario visualization, worldbuilding, plant metabolites, microalgae, scenario
146	(Kirksey, 2021)	Living Machines Go Wild			Anthropology, synthetic biology, iGEM, students, genetic engineering tools, competition
147	(Fulvi and Wodak, 2023)	Gambling on unknown unknowns: Risk ethics for a climate change technofix			Risk ethics, climate change, technofix, Negative Emissions Technologies (NETs), Synthetic Biology, IPCC, uncertainty
148	(Esquivel-Sada, 2022)	Responsible intellectual property rights? Untangling open-source biotech adherence to intellectual property rights through DIYbio			Open-source biotechnology, Intellectual property, Bio-hacking, DIYbio, Synthetic biology, Life patenting, anti-commons crisis, Do-It-Yourself biology, IP rights, dual-use device, dual-use systems
149	(Wickberg, 2021)	Strange Natures: Conservation in the Era of Synthetic Biology		Book review	Synthetic biology, conservation, book review
150	(Ribeiro et al., 2023)	The digitalisation paradox of everyday scientific labour: How mundane knowledge work is amplified and diversified in the biosciences			Automation, Digitalization, Synthetic biology, Practice, Work, Labor
151	(Szocik et al., 2021)	Future space missions and human enhancement: Medical and ethical challenges			Space missions, Space settlement, Human enhancement, Gene editing, CRISPR, Synthetic biology, Bioethics, implants, ethics
152	(Holland et al., 2024)	Innovation intermediaries at the convergence of digital technologies, sustainability, and governance: A case study of AI-enabled engineering biology			Innovation intermediaries, Responsible innovation, Technological convergence, sustainability, governance, AI, AI-enabled engineering, AI, convergence, biomanufacturing, bioeconomy, synthetic biology, engineering biology, applications, digital-enabled transformation, design-build-test systems
153	(Lawson et al., 2021)	Machine learning for metabolic engineering: A review			Machine Learning, Metabolic Engineering, Synthetic Biology, Deep Learning, practitioners, engineers, scale-up, future perspectives, metabolic engineers, biochemists, microbiologists, computer scientists, electrical engineers, chemical engineers, mathematicians, statisticians, physicists, AI
154	(Watkins et al., 2023)	Public biofoundries as innovation intermediaries: the integration of translation, sustainability, and responsibility			Innovation intermediaries, Public biofoundries, Engineering biology, Translation, Sustainability, Responsibility
155	(Vinke, Rais and Millett, 2022)	The Dual-Use Education Gap: Awareness and Education of Life Science Researchers on Nonpathogen-Related Dual-Use Research			Dual-usescience, Biosecurity, Bioethics, Molecular biology, synthetic biology, iGEM, self-regulatory approach
156	(Mourby et al., 2022)	Biomodifying the ‘natural’: from Adaptive Regulation to Adaptive Societal Governance			Biomodifying technologies, regulation, adaptive regulation, societal governance, governance, gene editing, induced pluripotent stem cells, bioprinting, applications, lab-grown meat, pest control, medicine, assessment schemes, regulatory flexibility, stakeholder engagement, biomodification, global observatory model, biotechnology, legislative flexibility
157	(Gisselsson, 2022)	Next-Generation Biowarfare: Small in Scale, Sensational in Nature?			Biowarfare, synthetic biology
158	(Meissner et al., 2021)	The rise of do-it-yourself (DiY) laboratories: Implications for science, technology, and innovation (STI) policy			DiY laboratories, STI policy, science, technology, and innovation (STI) policy
159	(Dixon, 2023)	The bioinformational dilemma: where bioinformational diplomacy meets cyberbiosecurity			Bioinformational diplomacy, cyberbiosecurity, COVID-19, bioinformational secrecy, security dilemma, bioinformational dilemma, bioinformation, security, national security, diplomacy, global public health, emergencies, global public health emergencies,
160	(Bauer and Bogner, 2020)	Let's (not) talk about synthetic biology: Framing an emerging technology in public and stakeholder dialogues			Synthetic biology, technoscience, biotechnology debates, media frames, social progress, innovation, ethics, EU, EU FP7, Synergene, public policy, STS, risk, risk frame, biosafety, biosecurity risks, public dialogue, social engagement, technology policy, technology optimism, meta-frames, DIY-biology, NEST-ethics, synbio, Responsible Research and Innovation (RRI), bio-capitalism, social progress fr…
161	(Fantine, Margis, R., Talamini, E.l and Dewes, 2023)	Trends in Synthetic Biology in the Bioeconomy of Non-Food-Competing Biofuels			microbial production; bioethanol; biodiesel; SynB; food security; information science; scientometry
162	(Mialon et al., 2023)	GAIA: a benchmark for General AI Assistants		preprint	GAIA, AI assistants, GPT-4, AI benchmarks, fundamental abilities, reasoning, multi-modality handling, web browsing, tool-use proficiency, AGI, Artificial General Intelligence, LLMs
163	(Baker, 2017)	Synthetic Biology and the Marketplace: Building the new bioeconomy			Bioeconomy, synthetic biology, marketplace, DNA synthesis, Twist Bioscience, foundry, biofoundry, Ginkgo Bioworks, iGEM
164	(Hanczyc, 2020)	Engineering Life: A Review of Synthetic Biology		Review	Synthetic biology, genetic engineering, metabolic engineering, artificial cell, model-driven design, cell-free approaches, MAGE, feedback control, optimization, system control, modularity, standardization
165	(Garner, 2021)	Principles of synthetic biology			metabolic engineering, synthetic cells, regulatory circuits, synthetic genome, Design–Build–Test–Learn cycle, standardization, biomaterials, plug-and-play, off-the-shelf bioparts, bioparts
166	(Frow, 2020)	From “Experiments of Concern” to “Groups of Concern”: Constructing and Containing Citizens in Synthetic Biology			Synthetic biology, citizens, groups of concern, experiments of concern, governance, USA, UK, DNA technology, recombinant DNA technology, self-governance mechanisms, sociotechnical imaginaries, risks, national approaches, Asilomar
167	(Freemont, 2019)	Synthetic biology industry: data-driven design is creating new opportunities in biotechnology			biotechnology, industry, synthetic biology, startups, technology stack, open technology sharing, democratization, multinational corporations, technology monopolies, manufacturing revolution, biotechnology products, living therapies, synthetic biology market, biotechnology industry, biopharma industry
168	(Gomez-Hinostroza et al., 2023)	Current landscape and future directions of synthetic biology in South America			SynBio, South America, DIY, Latin America, TECNOx, Open science
169	(David et al., 2021)	A Perspective on Synthetic Biology in Drug Discovery and Development—Current Impact and Future Opportunities			Synthetic biology, drug discovery, impact, DNA synthesis, data science, workflows, AI, machine learning
170	(Marris and Calvert, 2020)	Science and Technology Studies in Policy: The UK Synthetic Biology Roadmap			STS, roadmap, UK, framing, responsible research and innovation (RRI), science and society, STS in policy, STS researchers, policy process, roadmapping, technological innovation, economic progress
171	(Vallero Daniel A. and Gunsch Claudia K., 2020)	Applications and Implications of Emerging Biotechnologies in Environmental Engineering			Synthetic biology, emerging biotechnologies, environmental engineering, remediation, waste treatment, risks, complexities, risk perception, risk assessment, ethics, engineering, environmental engineers, preventive approach
172	(Zarnack and Eyras, 2023)	‘Artificial intelligence and machine learning in RNA biology’			Algorithms, AI, biology, machine learning, RNA biology, bioinformatics, RNA structure prediction
173	(Jatain et al., 2021)	Synthetic biology potential for carbon sequestration into biocommodities			CO2 fixation pathway, CO2 sequestration, Metabolic engineering, Synthetic biology, System biology, Bioproducts, global warming, renewable energy source, microbial cell factories, biocommodities, carbon sequestration
174	(Matsuyama and Suzuki, 2019)	Systems and Synthetic microRNA Biology: From Biogenesis to Disease Pathogenesis			microRNA, RNAi, Drosha, Argonaute, biogenesis, super-enhancer, disease pathogenesis, synthetic biology
175	(Naderi Yeganeh et al., 2023)	PanomiR: a systems biology framework for analysis of multi-pathway targeting by miRNAs			microRNA, miRNA regulation, pathways, biological networks, systems biology, miRNA prioritization, pathway analysis, bioinformatics, computational biology, statistical models
176	(van Doren et al., 2022)	The external commercialisation of technology in emerging domains – the antecedents, consequences, and dimensions of desorptive capacity			Desorptive capacity, exploration & exploitation, management innovation, emerging technology domains, synthetic biology, commercial risks, technology commercialization, synthetic biology organizations, External technology commercialisation (ETC), positive network externalities
177	(Banda and Huzair, 2021)	Introduction to special issue: innovation/governance interactions in the bioeconomy		Introduction	Bioeconomy, governance, synthetic biology
178	(Tait and Wield, 2021)	Policy support for disruptive innovation in the life sciences			Science & technology and innovation policy studies, foresight, radical/disruptive innovation, industrial biotechnology
179	(Ahmed and Harrison, 2021)	Challenges and competencies of entrepreneurial leaders in driving innovation at DIY laboratories			Entrepreneurship, leadership, entrepreneurial leadership, DIY innovation, laboratories, synthetic biology, machine learning, office automation, technological competence
180	(Damoah and Botchie, 2021)	Do-It-Yourself (DIY) laboratories and science, technology, and innovation (STI): trends, implications and future research			Do-It-Yourself laboratory (DIY), Science technology and innovation (STI), systematic literature review, DIY activities
181	(Dzandu and Pathak, 2021)	Diy laboratories, their practices, and challenges – a systematic literature review			Do-it-yourself, DiY laboratories, innovation diffusion, digital innovation
182	(Liedong and Sarpong, 2021)	Taking stock and charting the future: the management and implications of DIY laboratories for innovation and society			Innovation studies, risk analysis and technology, technology & innovation studies, public understanding of science and technology
183	(Huzair, 2021)	Risk and regulatory culture: governing recombinant DNA technology in the UK from 1970–1980			Regulation, biotechnology, DNA, UK, recombinant DNA, laboratory work, laboratory safety, workers rights, epistemic cultures, regulatory space, deregulation
184	(Boyd and Wilson, 2020)	Existential Risks to Humanity Should Concern International Policymakers and More Could Be Done in Considering Them at the International Governance Level			Artificial intelligence; catastrophic risk; existential risk; nuclear war; synthetic biology; United Nations
185	(Thiele, 2020)	Nature 4.0: Assisted Evolution, De-extinction, and Ecological Restoration Technologies			Assisted evolution, ecological restoration, synthetic biology, Nature 4.0, re-create nature, biodiversity, cultural risks, ecological risks, risks, de-extinct species, environmentalists, conservationists, ecological restoration technologies
186	(Lockhart, Marvin and While, 2023)	Towards new ecologies of automation: Robotics and the re-engineering of nature			Automation, ecology, robotics, reengineering of nature, synthetic biology, climate breakdown, anthropocene, operational ecologies, critical geography, automation studies, political ecology
187	(Merchant et al., 2023)	Scaling deep learning for materials discovery			Deep learning, materials discovery, applications
188	(Tang et al., 2020)	Materials design by synthetic biology			Synthetic biology, materials design, genetic circuits, smart living materials, living sensors, therapeutics, electronics, programmable living materials, biomimicry, biomaterials, AI, machine learning
189	(Mateu-Sanz et al., 2023)	Redefining biomaterial biocompatibility: challenges for artificial intelligence and text mining			Biomaterial, biocompatibility, databases, artificial intelligence, data mining, natural language processing, international organization for standardization (ISO)
190	(Burgos-Morales et al., 2021)	Synthetic biology as driver for the biologization of materials sciences			Interactive materials, Engineered living materials, Metabolic engineering, Cell encapsulation, Nanomaterials, Smart materials, Stimulus-responsive materials, AI, machine learning, synthetic biology, materials sciences
191	(Scheper et al., 2021)	Digitalization and Bioprocessing: Promises and Challenges		Book chapter	Digitalization, Digital twins FDA, QbD, Regulatory considerations, bioprocessing, biotech, synthetic biology, biopharmaceuticals
192	(Zhu et al., 2023)	Current advances of biocontainment strategy in synthetic biology			Genetically modified organisms (GMOs), Biocontainment, Biosecurity, Synthetic biology, Molecular biology, Biotechnology
193	(Asin-Garcia et al., 2020)	Genetic Safeguards for Safety-by-design: So Close Yet So Far			Safety-by-designs, synthetic biology, genetic safeguards, biocontainment, biosafety, auxotrophy, semantic containment, combinatorial systems
194	(Schmidt and de Lorenzo, 2016)	Synthetic bugs on the loose: containment options for deeply engineered (micro)organisms			Synthetic biology, engineered microorganisms, synthetic bugs, xenobiology, certainty-of-containment, gene drive, standardized metrics
195	(Moon, 2023)	EBRC: Enhancing bioeconomy through research and communication			Executive order, Biomanufacturing, Biotechnology, Next generation, Disruptive research, Diversity, equity and inclusion, International collaboration, Biosecurity, biosafety and bioethics, Data sharing, Global issue, GMO, CRISPR, USA, Dual Use Research of Concern (DURC), antibiotic resistance genes (ARGs) , genetically engineered microbes (GEMs), user-friendly interfaces, DEI
196	(Bohua et al., 2023)	Ethical framework on risk governance of synthetic biology			Synthetic biology, Ethical framework, Biosafety, Precautionary principle, Environmental risks
197	(Lee and Kim, 2023)	Cell-Free Synthetic Biology: Navigating the New Frontiers of Biomanufacturing and Biological Engineering			synthetic biology, cell-free synthetic biology, systems biology, protein synthesis, metabolic engineering, biomaterials, machine learning, AI
198	(Tinafar, Jaenes and Pardee, 2019)	Synthetic Biology Goes Cell-Free			Cell-free systems (CFS), synthetic biology, AI rational design, genetically programmable tools, in vitro platforms, centralized production, high-value commodities, unexpected outcomes, creative outcomes, nano-scale materials, engineered enzymes, machine learning
199	(Dixon et al., 2022)	A global forum on synthetic biology: the need for international engagement			Synthetic biology, molecular engineering, policy. Flourishing, minimising the downsides, global forum, COVID-19, dual-use, governance
200	(de Lorenzo, Krasnogor and Schmidt, 2021)	For the sake of the Bioeconomy: define what a Synthetic Biology Chassis is!			GMOs, recombinant DNA, genetic implant, traceability, containment, barcoding, digital twins, watermarking, DNA steganography, Pseudomonas putida, synbio chassis, generally regarded as safe (GRAS), environmental risk assessment (ERA)
201	(Rennings, Burgsmüller and Bröring, 2023)	Convergence towards a digitalized bioeconomy—Exploring cross-industry merger and acquisition activities between the bioeconomy and the digital economy			Bioeconomy, M&A, digital economy, convergence literature, coupling transition theory
202	(Bröring, Laibach and Wustmans, 2020)	Innovation types in the bioeconomy			Innovation types, Bioeconomy, Circular economy, Sustainability, Sustainability-oriented innovation, Bio-based production, synthetic biology
201	(Marvik and Philp 2020)	The systemic challenge of the bioeconomy			Bioeconomy, systemic challenge, policy, innovation, food security, energy security, climate resilience, politics, political economy, transition, industrial manufacturing, agriculture, forestry, marine resources, waste management, renewable carbon strategy, land usage, industry policy, taxation, direct market intervention, mandated production, biofuels, value chain policies, gas fermentation, hydr…
References
Achim, R. and Zhang, X. (2022) ‘Exploring the social, ethical, legal, and responsibility dimensions of artificial intelligence for health-a new column in Intelligent Medicine’, Intelligent Medicine [Preprint]. Available at: https://mednexus.org/doi/10.1016/j.imed.2021.12.002 (Accessed: 27 November 2023).
A Dixon, T., C Curach, N. and Pretorius, I.S. (2020) ‘Bio-informational futures: The convergence of artificial intelligence and synthetic biology’, EMBO reports, 21(3), p. e50036.
Ahmed, F. and Harrison, C. (2021) ‘Challenges and competencies of entrepreneurial leaders in driving innovation at DIY laboratories’, Technology Analysis & Strategic Management, 33(10), pp. 1132–1146.
Alexander Hamilton, R. et al. (2021) Opportunities, Challenges, and Future Considerations for Top-Down Governance for Biosecurity and Synthetic Biology. Springer.
Aparicio, A. (2021) ‘“That would break the containment”: the co-production of responsibility and safety-by-design in xenobiology’, Journal of Responsible Innovation, 8(1), pp. 6–27.
Asin-Garcia, E. et al. (2020) ‘Genetic Safeguards for Safety-by-design: So Close Yet So Far’, Trends in biotechnology, 38(12), pp. 1308–1312.
Ataii, N. et al. (2023) ‘Enabling AI in Synthetic Biology through Construction File Specification’, bioRxiv. Available at: https://doi.org/10.1101/2023.06.28.546630.
Baker, B. (2017) ‘Synthetic Biology and the Marketplace: Building the new bioeconomy’, Bioscience, 67(10), pp. 877–883.
Banda, G. and Huzair, F. (2021) ‘Introduction to special issue: innovation/governance interactions in the bioeconomy’, Technology Analysis & Strategic Management, 33(3), pp. 257–259.
Bauer, A. and Bogner, A. (2020) ‘Let’s (not) talk about synthetic biology: Framing an emerging technology in public and stakeholder dialogues’, Public understanding of science , 29(5), pp. 492–507.
Beardall, W.A.V., Stan, G.-B. and Dunlop, M.J. (2022) ‘Deep Learning Concepts and Applications for Synthetic Biology’, GEN biotechnology, 1(4), pp. 360–371.
Beeckman, D.S.A. and Rüdelsheim, P. (2020) ‘Biosafety and Biosecurity in Containment: A Regulatory Overview’, Frontiers in bioengineering and biotechnology, 8, p. 650.
Belda, I. et al. (2021) ‘Seeding the idea of encapsulating a representative synthetic metagenome in a single yeast cell’, Nature communications, 12(1), p. 1599.
Bhardwaj, A., Kishore, S. and Pandey, D.K. (2022) ‘Artificial Intelligence in Biological Sciences’, Life , 12(9). Available at: https://doi.org/10.3390/life12091430.
Bianchini, F. (2023) ‘A New Definition of “Artificial” for Two Artificial Sciences’, Foundations of science, 28(1), pp. 401–417.
Blackiston, D. et al. (2023) ‘Biological Robots: Perspectives on an Emerging Interdisciplinary Field’, Soft robotics, 10(4), pp. 674–686.
Blok, V. and von Schomberg, L. (2023) ‘Introduction’, in V. Blok (ed.) Putting Responsible Research and Innovation into Practice: A Multi-Stakeholder Approach. Cham: Springer International Publishing, pp. 1–7.
Bohua, L. et al. (2023) ‘Ethical framework on risk governance of synthetic biology’, Journal of Biosafety and Biosecurity, 5(2), pp. 45–56.
Bongard, J. and Levin, M. (2023) ‘There’s Plenty of Room Right Here: Biological Systems as Evolved, Overloaded, Multi-Scale Machines’, Biomimetics, 8(1). Available at: https://doi.org/10.3390/biomimetics8010110.
Boyd, M. and Wilson, N. (2020) ‘Existential Risks to Humanity Should Concern International Policymakers and More Could Be Done in Considering Them at the International Governance Level’, Risk analysis: an official publication of the Society for Risk Analysis, 40(11), pp. 2303–2312.
Bray, D. (2023) Artificial Intelligence and Synthetic Biology Are Not Harbingers of Doom. Stimson. Available at: https://www.stimson.org/2023/artificial-intelligence-and-synthetic-biology-are-not-harbingers-of-doom/ (Accessed: 27 November 2023).
Bröring, S., Laibach, N. and Wustmans, M. (2020) ‘Innovation types in the bioeconomy’, Journal of cleaner production, 266, p. 121939.
Burgos-Morales, O. et al. (2021) ‘Synthetic biology as driver for the biologization of materials sciences’, Materials today. Bio, 11, p. 100115.
Camacho, D.M. et al. (2018) ‘Next-Generation Machine Learning for Biological Networks’, Cell, 173(7), pp. 1581–1592.
Capponi, S. and Daniels, K.G. (2023) ‘Harnessing the power of artificial intelligence to advance cell therapy’, Immunological reviews, 320(1), pp. 147–165.
Carbonell, P., Radivojevic, T. and García Martín, H. (2019) ‘Opportunities at the Intersection of Synthetic Biology, Machine Learning, and Automation’, ACS synthetic biology, 8(7), pp. 1474–1477.
Carter, S.R. et al. (2023) The Convergence of Artificial Intelligence and the Life Sciences, The Nuclear Threat Initiative. NTI. Available at: https://www.nti.org/analysis/articles/the-convergence-of-artificial-intelligence-and-the-life-sciences/ (Accessed: 27 November 2023).
Cho, M.K. and Relman, D.A. (2010) ‘Genetic technologies. Synthetic “life,” ethics, national security, and public discourse’, Science, pp. 38–39.
Clusmann, J. et al. (2023) ‘The future landscape of large language models in medicine’, Communication & medicine, 3(1), p. 141.
Cubillos-Ruiz, A. et al. (2021) ‘Engineering living therapeutics with synthetic biology’, Nature reviews. Drug discovery, 20(12), pp. 941–960.
D’Alessandro, W., Lloyd, H.R. and Sharadin, N. (2023) ‘Large Language Models and Biorisk’, The American journal of bioethics: AJOB, 23(10), pp. 115–118.
Damiano, L., Kuruma, Y. and Stano, P. (2016) ‘What can synthetic biology offer to artificial intelligence (and vice versa)?’, Bio Systems, 148, pp. 1–3.
Damiano, L. and Stano, P. (2023) ‘Explorative Synthetic Biology in AI: Criteria of Relevance and a Taxonomy for Synthetic Models of Living and Cognitive Processes’, Artificial life, 29(3), pp. 367–387.
Damoah, I.S. and Botchie, D. (2021) ‘Do-It-Yourself (DIY) laboratories and science, technology, and innovation (STI): trends, implications and future research’, Technology Analysis & Strategic Management, 33(10), pp. 1267–1280.
David, F. et al. (2021) ‘A Perspective on Synthetic Biology in Drug Discovery and Development-Current Impact and Future Opportunities’, SLAS discovery : advancing life sciences R & D, 26(5), pp. 581–603.
DiEuliis, D. et al. (2019) ‘Does Biotechnology Pose New Catastrophic Risks?’, Current topics in microbiology and immunology, 424, pp. 107–119.
Dixon, T.A. et al. (2022) ‘A global forum on synthetic biology: the need for international engagement’, Nature communications, 13(1), p. 3516.
Dixon, T.A. (2023) ‘The bioinformational dilemma: where bioinformational diplomacy meets cyberbiosecurity’, Australian Journal of International Affairs, 77(2), pp. 169–187.
Dixon, T.A. and Pretorius, I.S. (2020) ‘Drawing on the Past to Shape the Future of Synthetic Yeast Research’, International journal of molecular sciences, 21(19). Available at: https://doi.org/10.3390/ijms21197156.
Dixon, T.A., Walker, R.S.K. and Pretorius, I.S. (2023) ‘Visioning synthetic futures for yeast research within the context of current global techno-political trends’, Yeast , 40(10), pp. 443–456.
Djeffal, C., Siewert, M.B. and Wurster, S. (2022) ‘Role of the state and responsibility in governing artificial intelligence: a comparative analysis of AI strategies’, Journal of European Public Policy, 29(11), pp. 1799–1821.
van Doren, D. et al. (2022) ‘The external commercialisation of technology in emerging domains – the antecedents, consequences, and dimensions of desorptive capacity’, Technology Analysis & Strategic Management, 34(3), pp. 258–273.
Dzandu, M.D. and Pathak, B. (2021) ‘Diy laboratories, their practices, and challenges – a systematic literature review’, Technology Analysis & Strategic Management, 33(10), pp. 1242–1254.
Ebrahimkhani, M.R. and Levin, M. (2021) ‘Synthetic living machines: A new window on life’, iScience, 24(5), p. 102505.
Edwards, B. (2014) ‘Taking stock of security concerns related to synthetic biology in an age of responsible innovation’, Frontiers in public health, 2, p. 79.
El Karoui, M., Hoyos-Flight, M. and Fletcher, L. (2019) ‘Future Trends in Synthetic Biology-A Report’, Frontiers in bioengineering and biotechnology, 7, p. 175.
Endy, D. (2005) ‘Foundations for engineering biology’, Nature, 438(7067), pp. 449–453.
Eslami, M. et al. (2022) ‘Artificial intelligence for synthetic biology’, Communications of the ACM, 65(5), pp. 88–97.
Esquivel-Sada, D. (2022) ‘Responsible intellectual property rights? Untangling open-source biotech adherence to intellectual property rights through DIYbio’, Technology in society, 70, p. 102005.
Evans, S.W. (, 2022) ‘When All Research Is Dual Use’, Issues in science and technology, 38(3). Available at: https://issues.org/dual-use-research-biosecurity-social-context-science-evans/ (Accessed: 28 November 2023).
Fantine, A.L., Margis, R., Talamini, E.l and Dewes, H. (2023) ‘Trends in Synthetic Biology in the Bioeconomy of Non-Food-Competing Biofuels’, SynBio, 1(1). Available at: https://www.mdpi.com/2674-0583/1/1/3.
Freemont, P.S. (2019) ‘Synthetic biology industry: data-driven design is creating new opportunities in biotechnology’, Emerging topics in life sciences, 3(5), pp. 651–657.
Frow, E. (2020) ‘From “Experiments of Concern” to “Groups of Concern”: Constructing and Containing Citizens in Synthetic Biology’, Science, technology & human values, 45(6), pp. 1038–1064.
Fulvi, D. and Wodak, J. (2023) ‘Gambling on unknown unknowns: Risk ethics for a climate change technofix’, The Anthropocene Review, p. 20530196231204324.
Garner, K.L. (2021) ‘Principles of synthetic biology’, Essays in biochemistry, 65(5), pp. 791–811.
‘Generating “smarter” biotechnology’ (2023) Nature biotechnology, 41(2), p. 157.
Getz, L.J. and Dellaire, G. (2018) ‘Angels and Devils: Dilemmas in Dual-Use Biotechnology’, Trends in biotechnology, 36(12), pp. 1202–1205.
Gisselsson, D. (2022) ‘Next-Generation Biowarfare: Small in Scale, Sensational in Nature?’, Health security, 20(2), pp. 182–186.
Gomez-Hinostroza, E.S. et al. (2023) ‘Current landscape and future directions of synthetic biology in South America’, Frontiers in bioengineering and biotechnology, 11, p. 1069628.
Grinbaum, A. and Adomaitis, L. (2023) ‘Dual Use Concerns of Generative AI and Large Language Models’, arXiv [cs.CY]. Available at: http://arxiv.org/abs/2305.07882.
Gronvall, G.K. (2018) ‘Safety, security, and serving the public interest in synthetic biology’, Journal of industrial microbiology & biotechnology, 45(7), pp. 463–466.
Hagendorff, T. (2021) ‘Forbidden knowledge in machine learning reflections on the limits of research and publication’, AI & society, 36(3), pp. 767–781.
Hamlyn, O. (2022) ‘Synthesize this: integrating innovation governance and EU regulation of synthetic biology’, Journal of law and society, 49(3), pp. 577–602.
Hammang, A. (2023) ‘Troubleshooting: The Automation of Synthetic Biology and the Labor of Technological Futures’, Science, technology & human values, p. 01622439221149524.
Hanczyc, M.M. (2020) ‘Engineering Life: A Review of Synthetic Biology’, Artificial life, 26(2), pp. 260–273.
Hanson, A.D. and Lorenzo, V. de (2023) ‘Synthetic Biology─High Time to Deliver?’, ACS synthetic biology, 12(6), pp. 1579–1582.
Harrer, S. (2023) ‘Attention is not all you need: the complicated case of ethically using large language models in healthcare and medicine’, EBioMedicine, 90, p. 104512.
Hassoun, S. et al. (2022) ‘Artificial Intelligence for Biology’, Integrative and comparative biology, 61(6), pp. 2267–2275.
Helmy, M., Smith, D. and Selvarajoo, K. (2020) ‘Systems biology approaches integrated with artificial intelligence for optimized metabolic engineering’, Metabolic engineering communications, 11, p. e00149.
Heyndrickx, W. et al. (2023) ‘MELLODDY: Cross-pharma Federated Learning at Unprecedented Scale Unlocks Benefits in QSAR without Compromising Proprietary Information’, Journal of chemical information and modeling [Preprint]. Available at: https://doi.org/10.1021/acs.jcim.3c00799.
Hillson, N. et al. (2019) ‘Building a global alliance of biofoundries’, Nature communications, 10(1), p. 2040.
Hınçer, A. et al. (2023) ‘Making the Next Generation of Therapeutics: mRNA Meets Synthetic Biology’, ACS synthetic biology, 12(9), pp. 2505–2515.
Hoffmann, A. (2023) ‘Designer genes courtesy of artificial intelligence’, Genes & development, 37(9-10), pp. 351–353.
Hoffmann, S.A. et al. (2023) ‘Safety by design: Biosafety and biosecurity in the age of synthetic genomics’, iScience, 26(3), p. 106165.
Holland, C. et al. (2024) ‘Innovation intermediaries at the convergence of digital technologies, sustainability, and governance: A case study of AI-enabled engineering biology’, Technovation, 129, p. 102875.
Holzinger, A. et al. (2023) ‘AI for life: Trends in artificial intelligence for biotechnology’, New biotechnology, 74, pp. 16–24.
Huzair, F. (2021) ‘Risk and regulatory culture: governing recombinant DNA technology in the UK from 1970–1980’, Technology Analysis & Strategic Management, 33(3), pp. 260–270.
Ienca, M. and Vayena, E. (2018) ‘Dual use in the 21st century: emerging risks and global governance’, Swiss medical weekly, 148, p. w14688.
Jafari, M. et al. (2023) ‘Merging machine learning and bioelectronics for closed-loop control of biological systems and homeostasis’, Cell Reports Physical Science, 4(8), p. 101535.
Jatain, I. et al. (2021) ‘Synthetic biology potential for carbon sequestration into biocommodities’, Journal of cleaner production, 323, p. 129176.
Jin, Q. et al. (2023) ‘GeneGPT: Augmenting Large Language Models with Domain Tools for Improved Access to Biomedical Information’, ArXiv [Preprint]. Available at: https://www.ncbi.nlm.nih.gov/pubmed/37131884.
Kahl, L.J. and Endy, D. (2013) ‘A survey of enabling technologies in synthetic biology’, Journal of biological engineering, 7(1), p. 13.
Kather, J.N. et al. (2022) ‘Medical domain knowledge in domain-agnostic generative AI’, NPJ digital medicine, 5(1), p. 90.
Keiper, F. and Atanassova, A. (2020) ‘Regulation of Synthetic Biology: Developments Under the Convention on Biological Diversity and Its Protocols’, Frontiers in bioengineering and biotechnology, 8, p. 310.
Kirksey, E. (2021) ‘Living Machines Go Wild: Policing the Imaginative Horizons of Synthetic Biology’, Current anthropology, 62(S24), pp. S287–S297.
Kitano, S. et al. (2023) ‘Synthetic biology: Learning the way toward high-precision biological design’, PLoS biology, 21(4), p. e3002116.
Koskinen, R. (2020) ‘Could We Really Be Made of Swiss Cheese? Xenobiology as an Engineering Epistemology for Biological Realization’, Chembiochem: a European journal of chemical biology, 21(18), pp. 2591–2594.
Kumar, P., Sinha, R. and Shukla, P. (2022) ‘Artificial intelligence and synthetic biology approaches for human gut microbiome’, Critical reviews in food science and nutrition, 62(8), pp. 2103–2121.
Lawrence, D.R. (2019) ‘Advanced bioscience and AI: debugging the future of life’, Emerging topics in life sciences, 3(6), pp. 747–751.
Lawson, C.E. et al. (2021) ‘Machine learning for metabolic engineering: A review’, Metabolic engineering, 63, pp. 34–60.
Lee, S.J. and Kim, D.-M. (2023) ‘Cell-Free Synthetic Biology: Navigating the New Frontiers of Biomanufacturing and Biological Engineering’, Current Opinion in Systems Biology, p. 100488.
Lee, T. and George, J. (2023) ‘Future worldbuilding with synthetic biology: A case study in interdisciplinary scenario visualization’, Futures, 147, p. 103118.
Lev, O. (2019) ‘Regulating dual-use research: Lessons from Israel and the United States’, Journal of Biosafety and Biosecurity, 1(2), pp. 80–85.
Liedong, T.A. and Sarpong, D. (2021) ‘Taking stock and charting the future: the management and implications of DIY laboratories for innovation and society’, Technology Analysis & Strategic Management, 33(10), pp. 1119–1131.
Li, J. et al. (2021) ‘Advances in Synthetic Biology and Biosafety Governance’, Frontiers in bioengineering and biotechnology, 9, p. 598087.
Li, J. et al. (2023) ‘ChatGPT in healthcare: A taxonomy and systematic review’, bioRxiv. Available at: https://doi.org/10.1101/2023.03.30.23287899.
Linkov, I., Trump, B.D., Anklam, E., et al. (2018) ‘Comparative, collaborative, and integrative risk governance for emerging technologies’, Environment systems & decisions, 38(2), pp. 170–176.
Linkov, I., Trump, B.D., Poinsatte-Jones, K., et al. (2018) ‘Governance Strategies for a Sustainable Digital World’, Sustainability: Science Practice and Policy, 10(2), p. 440.
Li, Z. et al. (2022) ‘An Account of Models of Molecular Circuits for Associative Learning with Reinforcement Effect and Forced Dissociation’, Sensors , 22(15). Available at: https://doi.org/10.3390/s22155907.
Lockhart, A., Marvin, S. and While, A. (2023) ‘Towards new ecologies of automation: Robotics and the re-engineering of nature’, Geoforum; journal of physical, human, and regional geosciences, 145, p. 103825.
de Lorenzo, V., Krasnogor, N. and Schmidt, M. (2021) ‘For the sake of the Bioeconomy: define what a Synthetic Biology Chassis is!’, New biotechnology, 60, pp. 44–51.
Lubiana, T. et al. (2023) ‘Ten quick tips for harnessing the power of ChatGPT in computational biology’, PLoS computational biology, 19(8), p. e1011319.
Luo, R. et al. (2022) ‘BioGPT: generative pre-trained transformer for biomedical text generation and mining’, Briefings in bioinformatics, 23(6). Available at: https://doi.org/10.1093/bib/bbac409.
Mahesh, N. et al. (2023) ‘Viable remediation techniques to cleansing wastewaters comprising endocrine-disrupting compounds’, Environmental research, 231(Pt 3), p. 116245.
Mampuys, R. and Brom, F. (2018) ‘Emerging crossover technologies: How to organize a biotechnology that becomes mainstream?’, Environment Systems and Decisions, 38(2), pp. 163–169.
Marris, C. and Calvert, J. (2020) ‘Science and Technology Studies in Policy: The UK Synthetic Biology Roadmap’, Science, technology & human values, 45(1), pp. 34–61.
Martin, H.G. et al. (2023) ‘Perspectives for self-driving labs in synthetic biology’, Current opinion in biotechnology, 79, p. 102881.
Mateu-Sanz, M. et al. (2023) ‘Redefining biomaterial biocompatibility: challenges for artificial intelligence and text mining’, Trends in biotechnology [Preprint]. Available at: https://doi.org/10.1016/j.tibtech.2023.09.015.
Matsuyama, H. and Suzuki, H.I. (2019) ‘Systems and Synthetic microRNA Biology: From Biogenesis to Disease Pathogenesis’, International journal of molecular sciences, 21(1). Available at: https://doi.org/10.3390/ijms21010132.
Meissner, D. et al. (2021) ‘The rise of do-it-yourself (DiY) laboratories: Implications for science, technology, and innovation (STI) policy’, Technological forecasting and social change, 165, p. 120589.
Merchant, A. et al. (2023) ‘Scaling deep learning for materials discovery’, Nature [Preprint]. Available at: https://doi.org/10.1038/s41586-023-06735-9.
Mervin, L.H. et al. (2021) ‘Uncertainty quantification in drug design’, Drug discovery today, 26(2), pp. 474–489.
Mialon, G. et al. (2023) ‘GAIA: a benchmark for General AI Assistants’, arXiv [cs.CL]. Available at: http://arxiv.org/abs/2311.12983.
Millett, P. et al. (2020) ‘The synthetic-biology challenges for biosecurity: examples from iGEM’, The Nonproliferation Review, 27(4-6), pp. 443–458.
Millett, P. and Alexanian, T. (2021) ‘Implementing adaptive risk management for synthetic biology: Lessons from iGEM’s safety and security programme’, Engineering biology, 5(3), pp. 64–71.
Mökander, J. et al. (2022) ‘Challenges and best practices in corporate AI governance: Lessons from the biopharmaceutical industry’, Frontiers in Computer Science, 4. Available at: https://doi.org/10.3389/fcomp.2022.1068361.
Moon, T.S. (2023) ‘EBRC: Enhancing bioeconomy through research and communication’, New biotechnology, 78, pp. 150–152.
Morris, M.R. (2023) ‘Scientists’ Perspectives on the Potential for Generative AI in their Fields’, arXiv [cs.CY]. Available at: http://arxiv.org/abs/2304.01420.
Mourby, M. et al. (2022) ‘Biomodifying the “natural”: from Adaptive Regulation to Adaptive Societal Governance’, Journal of law and the biosciences, 9(1), p. lsac018.
Murashov, V., Howard, J. and Schulte, P. (2020) ‘Synthetic Biology Industry: Biosafety Risks to Workers’, in B.D. Trump et al. (eds) Synthetic Biology 2020: Frontiers in Risk Analysis and Governance. Cham: Springer International Publishing, pp. 165–182.
Naderi Yeganeh, P. et al. (2023) ‘PanomiR: a systems biology framework for analysis of multi-pathway targeting by miRNAs’, Briefings in bioinformatics, 24(6). Available at: https://doi.org/10.1093/bib/bbad418.
Nelson, C. et al. (2021) ‘Foresight in Synthetic Biology and Biotechnology Threats’, in B.D. Trump et al. (eds) Emerging Threats of Synthetic Biology and Biotechnology: Addressing Security and Resilience Issues. Dordrecht (DE): Springer.
Nesbeth, D.N. et al. (2016) ‘Synthetic biology routes to bio-artificial intelligence’, Essays in biochemistry, 60(4), pp. 381–391.
Nguyen, D.-H. et al. (2023) ‘Bioengineering of bacteria for cancer immunotherapy’, Nature communications, 14(1), p. 3553.
Nylund, P.A. et al. (2022) ‘The emergence of entrepreneurial ecosystems based on enabling technologies: Evidence from synthetic biology’, Journal of business research, 149, pp. 728–735.
O’Brien, J.T. and Nelson, C. (2020) ‘Assessing the Risks Posed by the Convergence of Artificial Intelligence and Biotechnology’, Health security, 18(3), pp. 219–227.
Oliveira, S.M.D. and Densmore, D. (2022) ‘Hardware, Software, and Wetware Codesign Environment for Synthetic Biology’, Biodesign research, 2022, p. 9794510.
Ou, Y. and Guo, S. (2023) ‘Safety risks and ethical governance of biomedical applications of synthetic biology’, Frontiers in bioengineering and biotechnology, 11, p. 1292029.
Palmer, M.J., Fukuyama, F. and Relman, D.A. (2015) ‘SCIENCE GOVERNANCE. A more systematic approach to biological risk’, Science, 350(6267), pp. 1471–1473.
Pannu, J. et al. (2022) ‘Strengthen oversight of risky research on pathogens’, Science, 378(6625), pp. 1170–1172.
Pansera, M. et al. (2020) ‘Embedding responsible innovation within synthetic biology research and innovation: insights from a UK multi-disciplinary research centre’, Journal of Responsible Innovation, 7(3), pp. 384–409.
Patel, V.L. et al. (2009) ‘The coming of age of artificial intelligence in medicine’, Artificial intelligence in medicine, 46(1), pp. 5–17.
de Pedraza, P. and Vollbracht, I. (2023) ‘General theory of data, artificial intelligence and governance’, Humanities and Social Sciences Communications, 10(1), pp. 1–16.
Pei, L., Garfinkel, M. and Schmidt, M. (2022) ‘Bottlenecks and opportunities for synthetic biology biosafety standards’, Nature communications, 13(1), p. 2175.
Perrakis, A. and Sixma, T.K. (2021) ‘AI revolutions in biology: The joys and perils of AlphaFold’, EMBO reports, 22(11), p. e54046.
Pio-Lopez, L. (2021) ‘The rise of the biocyborg: synthetic biology, artificial chimerism and human enhancement’, New genetics and society, 40(4), pp. 599–619.
Qiu, Y. and Wei, G.-W. (2023) ‘Artificial intelligence-aided protein engineering: from topological data analysis to deep protein language models’, Briefings in bioinformatics, 24(5). Available at: https://doi.org/10.1093/bib/bbad289.
Qureshi, R. et al. (2023) ‘AI in drug discovery and its clinical relevance’, Heliyon, 9(7), p. e17575.
Radivojević, T. et al. (2020) ‘A machine learning Automated Recommendation Tool for synthetic biology’, Nature communications, 11(1), p. 4879.
Ray, P.P. (2023) ‘ChatGPT: A comprehensive review on background, applications, key challenges, bias, ethics, limitations and future scope’, Internet of Things and Cyber-Physical Systems, 3, pp. 121–154.
Rennings, M., Burgsmüller, A.P.F. and Bröring, S. (2023) ‘Convergence towards a digitalized bioeconomy—Exploring cross‐industry merger and acquisition activities between the bioeconomy and the digital economy’, Business strategy & development, 6(1), pp. 53–74.
Reynolds, J.L. (2021) ‘Engineering biological diversity: the international governance of synthetic biology, gene drives, and de-extinction for conservation’, Current Opinion in Environmental Sustainability, 49, pp. 1–6.
Ribeiro, B. et al. (2023) ‘The digitalisation paradox of everyday scientific labour: How mundane knowledge work is amplified and diversified in the biosciences’, Research policy, 52(1), p. 104607.
Rudolph, A. et al. (2023) ‘Strategies to identify and edit improvements in synthetic genome segments episomally’, Nucleic acids research, 51(18), pp. 10094–10106.
Sandbrink, J. (2023) Panoptic dual-use management: preventing deliberate pandemics in an age of synthetic biology and artificial intelligence. University of Oxford. Available at: https://doi.org/10.5287/ORA-BPQK58EAD.
Sandbrink, J.B. (2023) ‘Artificial intelligence and biological misuse: Differentiating risks of language models and biological design tools’, arXiv [cs.CY]. Available at: http://arxiv.org/abs/2306.13952.
Sarkar, C. et al. (2023) ‘Artificial Intelligence and Machine Learning Technology Driven Modern Drug Discovery and Development’, International journal of molecular sciences, 24(3). Available at: https://doi.org/10.3390/ijms24032026.
Schaefer, M. et al. (2023) ‘Large language models are universal biomedical simulators’, bioRxiv. Available at: https://doi.org/10.1101/2023.06.16.545235.
Scheper, T. et al. (2021) ‘Digitalization and Bioprocessing: Promises and Challenges’, in C. Herwig, R. Pörtner, and J. Möller (eds) Digital Twins: Tools and Concepts for Smart Biomanufacturing. Cham: Springer International Publishing, pp. 57–69.
Schmidt, M. and de Lorenzo, V. (2016) ‘Synthetic bugs on the loose: containment options for deeply engineered (micro)organisms’, Current opinion in biotechnology, 38, pp. 90–96.
Seydel, C. (2023) ‘DNA writing technologies moving toward synthetic genomes’, Nature biotechnology, 41(11), pp. 1504–1509.
Shapira, P., Kwon, S. and Youtie, J. (2017) ‘Tracking the emergence of synthetic biology’, Scientometrics, 112(3), pp. 1439–1469.
Shi, Z. et al. (2022) ‘Data-Driven Synthetic Cell Factories Development for Industrial Biomanufacturing’, Biodesign research, 2022, p. 9898461.
Soice, E.H. et al. (2023) ‘Can large language models democratize access to dual-use biotechnology?’, arXiv [cs.CY]. Available at: http://arxiv.org/abs/2306.03809.
Stano, P. (2023) ‘Chemical Systems for Wetware Artificial Life: Selected Perspectives in Synthetic Cell Research’, International journal of molecular sciences, 24(18). Available at: https://doi.org/10.3390/ijms241814138.
Sundaram, L.S., Ajioka, J.W. and Molloy, J.C. (2023) ‘Synthetic biology regulation in Europe: containment, release and beyond’, Synthetic Biology, 8(1), p. ysad009.
Sun, T. et al. (2022) ‘Challenges and recent progress in the governance of biosecurity risks in the era of synthetic biology’, Journal of Biosafety and Biosecurity, 4(1), pp. 59–67.
Szocik, K. et al. (2021) ‘Future space missions and human enhancement: Medical and ethical challenges’, Futures, 133, p. 102819.
Tait, J. and Wield, D. (2021) ‘Policy support for disruptive innovation in the life sciences’, Technology Analysis & Strategic Management, 33(3), pp. 307–319.
Tang, L. et al. (2023) ‘Synthetic biology and governance research in China: a 40-year evolution’, Scientometrics, 128(9), pp. 5293–5310.
Tang, T.-C. et al. (2020) ‘Materials design by synthetic biology’, Nature Reviews Materials, 6(4), pp. 332–350.
Tarasava, K. (2023) How AI Is Transforming Synthetic Biology: Reaching Far Beyond Biopharma. Available at: https://www.synbiobeta.com/read/how-ai-is-transforming-synthetic-biology-reaching-far-beyond-biopharma (Accessed: 28 November 2023).
Taylor, K. et al. (2023) ‘Intrinsic responsible innovation in a synthetic biology research project’, New genetics and society, 42(1), p. e2232684.
Tebeje, A., Tadesse, H. and Mengesha, Y. (2021) ‘Synthetic bio/techno/logy and its application’, Biotechnology, biotechnological equipment, 35(1), pp. 1156–1162.
Thiele, L.P. (2020) ‘Nature 4.0: Assisted evolution, DE-extinction, and ecological restoration technologies’, Global environmental politics, 20(3), pp. 9–27.
Tinafar, A., Jaenes, K. and Pardee, K. (2019) ‘Synthetic Biology Goes Cell-Free’, BMC biology, 17(1), p. 64.
Tong, Y. and Zhang, L. (2023) ‘Discovering the next decade’s synthetic biology research trends with ChatGPT’, Synthetic and systems biotechnology, 8(2), pp. 220–223.
Topol, E.J. (2019) ‘High-performance medicine: the convergence of human and artificial intelligence’, Nature medicine, 25(1), pp. 44–56.
Trump, B. et al. (2022) ‘Governing biotechnology to provide safety and security and address ethical, legal, and social implications’, Frontiers in genetics, 13, p. 1052371.
Trump, B.D. et al. (2019) ‘Co-evolution of physical and social sciences in synthetic biology’, Critical reviews in biotechnology, 39(3), pp. 351–365.
Trump, B.D. et al. (2020) ‘Building biosecurity for synthetic biology’, Molecular systems biology, 16(7), p. e9723.
Urbina, F. et al. (2022) ‘Dual Use of Artificial Intelligence-powered Drug Discovery’, Nature machine intelligence, 4(3), pp. 189–191.
Vallejos-Romero, A. et al. (2021) ‘Social sciences, risks and synthetic biology: A review of the literature’, Sociología y tecnociencia, 11(Extra_2), pp. 213–239.
Vallero Daniel A. and Gunsch Claudia K. (2020) ‘Applications and Implications of Emerging Biotechnologies in Environmental Engineering’, Journal of Environmental Engineering, 146(6), p. 03120005.
Vaseashta, A. (2023) ‘Existential Risks Associated with Dual-Use Technologies’, in T. Undheim and D. Zimmer (eds) Proceedings of the Stanford Existential Risks Conference 2023. Stanford University, pp. 156–170.
Vinke, S., Rais, I. and Millett, P. (2022) ‘The Dual-Use Education Gap: Awareness and Education of Life Science Researchers on Nonpathogen-Related Dual-Use Research’, Health security, 20(1), pp. 35–42.
Voigt, C.A. (2020) ‘Synthetic biology 2020-2030: six commercially-available products that are changing our world’, Nature communications, 11(1), p. 6379.
Wang, F. and Zhang, W. (2019) ‘Synthetic biology: Recent progress, biosafety and biosecurity concerns, and possible solutions’, Journal of Biosafety and Biosecurity, 1(1), pp. 22–30.
Wang, G. et al. (2023) ‘Ethical and social insights into synthetic biology: predicting research fronts in the post-COVID-19 era’, Frontiers in bioengineering and biotechnology, 11, p. 1085797.
Wani, A.K. et al. (2022) ‘Metagenomics and artificial intelligence in the context of human health’, Infection, genetics and evolution: journal of molecular epidemiology and evolutionary genetics in infectious diseases, 100, p. 105267.
Watkins, A. et al. (2023) ‘Public biofoundries as innovation intermediaries: the integration of translation, sustainability, and responsibility’, The Journal of technology transfer [Preprint]. Available at: https://doi.org/10.1007/s10961-023-10039-5.
Watters, C. and Lemanski, M.K. (2023) ‘Universal skepticism of ChatGPT: a review of early literature on chat generative pre-trained transformer’, Frontiers in big data, 6, p. 1224976.
Webster-Wood, V.A. et al. (2022) ‘Biohybrid robots: recent progress, challenges, and perspectives’, Bioinspiration & biomimetics, 18(1). Available at: https://doi.org/10.1088/1748-3190/ac9c3b.
Wickberg, A. (2021) ‘Strange natures: Conservation in the era of synthetic biology’, Global environmental politics, 21(4), pp. 158–160.
Wong, F. et al. (2023) ‘Discovering small-molecule senolytics with deep neural networks’, Nature aging, 3(6), pp. 734–750.
Wong, F., de la Fuente-Nunez, C. and Collins, J.J. (2023) ‘Leveraging artificial intelligence in the fight against infectious diseases’, Science, 381(6654), pp. 164–170.
Wu, T. et al. (2022) ‘Research Trends in the Application of Artificial Intelligence in Oncology: A Bibliometric and Network Visualization Study’, Frontiers in bioscience , 27(9), p. 254.
Xiao, Z. et al. (2023) ‘Generative Artificial Intelligence GPT-4 Accelerates Knowledge Mining and Machine Learning for Synthetic Biology’, ACS synthetic biology, 12(10), pp. 2973–2982.
Xu, D. et al. (2022) ‘Bibliometric analysis of artificial intelligence for biotechnology and applied microbiology: Exploring research hotspots and frontiers’, Frontiers in bioengineering and biotechnology, 10, p. 998298.
Xu, D. (2023) ‘ChatGPT opens a new door for bioinformatics’, Quantitative biology (Beijing, China), pp. 204–206.
Yamagata, M. (2023) ‘SynBio: A Journal for Advancing Solutions to Global Challenges’, SynBio, 1(3), pp. 190–193.
Yan, X. et al. (2023) ‘Applications of synthetic biology in medical and pharmaceutical fields’, Signal transduction and targeted therapy, 8(1), p. 199.
Yeo, H.C. and Selvarajoo, K. (2022) ‘Machine learning alternative to systems biology should not solely depend on data’, Briefings in bioinformatics, 23(6). Available at: https://doi.org/10.1093/bib/bbac436.
Yu, J., Wang, D. and Zheng, M. (2022) ‘Uncertainty quantification: Can we trust artificial intelligence in drug discovery?’, iScience, 25(8), p. 104814.
Zampieri, G. et al. (2019) ‘Machine and deep learning meet genome-scale metabolic modeling’, PLoS computational biology, 15(7), p. e1007084.
Zarnack, K. and Eyras, E. (2023) ‘Artificial intelligence and machine learning in RNA biology’, Briefings in bioinformatics, 24(6). Available at: https://doi.org/10.1093/bib/bbad415.
Zeng, X. et al. (2022) ‘Deep generative molecular design reshapes drug discovery’, Cell reports. Medicine, 3(12), p. 100794.
Zeng, X. et al. (2022) ‘Regulation and management of the biosecurity for synthetic biology’, Synthetic and systems biotechnology, 7(2), pp. 784–790.
Zeng, Y. et al. (2022) ‘Advanced genome-editing technologies enable rapid and large-scale generation of genetic variants for strain engineering and synthetic biology’, Current opinion in microbiology, 69, p. 102175.
Zhang, X.-E. et al. (2023) ‘Enabling technology and core theory of synthetic biology’, Science China. Life sciences, 66(8), pp. 1742–1785.
Zhao, H. (2022) ‘Synthetic Biology 2.0: The Dawn of a New Era’, ACS synthetic biology, 11(7), p. 2221.
Zhao, N. et al. (2023) ‘Synthetic biology-inspired cell engineering in diagnosis, treatment, and drug development’, Signal transduction and targeted therapy, 8(1), p. 112.
Zhu, X. et al. (2023) ‘Current advances of biocontainment strategy in synthetic biology’, Chinese journal of chemical engineering, 56, pp. 141–151.

## Sheet: Columns
Keywords
Forbidden knowledge	Machine learning	Artificial intelligence	Governance	Dual-use	Publication norms	open access	precautionary principle	AI ethics
Synthetic biology	Biotechnology	Nanotechnology	Governance	Risk assessment	Policy	Decision analysis	Regulations	key enabling technologies	emerging technologies	risk governance
Responsible Research and Innovation (RRI)	Research and Innovation (R & I)	disruptive technologies	synthetic biology	artificial intelligence	robotics	science	pandemic	responsible AI	responsible agroecology	Horizon 2020	science and society	civil society	science policy	EU	EU Framework Programme for Research and Innovation
Biological diversity	governance	synbio governance	gene drives	conservation	international law	national law	self-governance	conservationist synthetic biology	environmental risks	Convention on Biological Diversity (CBD)	emerging technologies
Yarrowia lipolytica; feature selection; human intervention; natural language processing; prompt engineering; transfer learning	information extraction	biomanufacturing	random forest model	machine learning (ML)	generative AI	metabolic engineering	synthetic biology
AI	synthetic biology	benevolence	pathogens	bioterrorism	precursor behaviors	LLMs
Convergence	AI	synthetic biology	bioscience	bioengineering	AI-bio capabilities	malicious actors	biological catastrophe	biological agents	pathogens	toxins	policy recommendations	AI guardrails	biosecurity	governance
chatGPT	synthetic biology research trends	conversation with chatGPT
DURC	LLMs	Dual Use Research of Concern (DURC) framework	AI governance	gain-of-function (GOF)	public safety	National Security Advisory Board for Biosecurity (NSABB)	Fink report	shared responsibility
Synbio	global challenges	synbio applications	AI
Intelligent medicine	AI in medicine	AI in healthcare	AI for health	AI governance	AI systems	ELSI/A	responsible research and innovation (RRI)	open science
chatGPT	taxonomy	systematic review	natural language processing (NLP)	OpenAI	AI	PubMed	biomedical datasets	medical applications	research gaps	clinical workflow	medical research	medical education	consultation	triage	translation	multimodal
metagenome; minimal genome; pan-genome; supernumerary neochromosome; synthetic communities; synthetic genome	yeast research	techno-political trends	Saccharomyces cerevisiae	AI-enabled tools for the life sciences	applied science	basic science	convergence	synthetic yeast research
Endocrine-disrupting chemicals (EDCs)	AI system	synthetic biology	biodegradation	wastewater
applied microbiology; artificial intelligence; bibliometric; biotechnology; deep learning; machine learning	disease diagnostics	drug research and development	functional genomics	biomarker recognition	medical imaging diagnostics	Web of Science Core Collection (WoSCC)	microRNA	protein-protein interactions (PPIs)
artificial intelligence; bibliometrics; cancer; deep learning; hotspots	AI in cancer	AI in oncology	AI in radiomics	AI in precision oncology	precision medicine	Science Citation Index Expanded	Scientific Reports	PloS	tissue microarray	tissue segmentation	artificial neural network
artificial intelligence (AI)	machine learning (ML)	artificial cell factories	industrial biomanufacturing	biomanufacturing	cell factories	protein function	non-natural biosynthesis pathways	pathway optimization	synthetic strains
Artificial intelligence; Food industry; Machine learning; Metabolic engineering; Systems biology	metabolic pathways	compound libraries	multi-omics	transcriptomics	proteomics	metabolomics	holistic understanding	industrial biotechnology	food-related substances	microorganisms
Drosophila; RNA polymerase II; core promoter; gene expression; transcription	machine learning	statistical learning model
cell signaling; cell therapy; machine learning; signaling motifs; synthetic biology	Artificial intelligence (AI)	machine learning (ML)	predictive models	experimental approaches	genome annotation	protein structure prediction	modular cell therapy technologies
Genome-editing	genetic variants	strain engineering	synthetic biology	CRISPR	RNA-based tools	AI-optimization algorithms	biomanufacturing	biosensing	high-throughput phenotyping	biological engineering
Uncertainty quantification	drug design	AI	drug-design	algorithms	autonomous decision-making	chemistry automation	decision-making	molecular de novo generation	synthetic route prediction	property predictions
Applied computing; Artificial intelligence; Drugs	Uncertainty quantification	drug design	human trust	applicability domain	training set	autonomous drug designing
bioorganic chemistry; multiple realizability; philosophy of science; synthetic biology; xenobiology	digital minds
self-driving labs (SDLs)	synthetic biology
AI	homo sapiens	sapient beings	sapient AIs	artificial intelligence; bioethics; new life; personhood; synthetic biology
bioengineering; developmental biology; synthetic biology	synthetic living machines	molecular genetics	morphogenesis	synthetic morphogenesis	meso-scale morpogenesis	self-assembly	emergent self-organization	synthetic anatomies	evolutionary cell biology
artificial intelligence; artificial life; biology; computer science; evolution; machine learning; robot	biomimetics	biological systems	multi-scale machines	intelligent machines	physical computing	polycomputing	overloading	regenerative medicine
animal cap; biorobot; computer science; developmental biology; embryo; robot; synthetic bioengineering; xenobot	regenerative medicine	synthetic living machines
biohybrid; cyborg; living machines	biohybrid robotics	microorganism bots	sperm-bots	tissue-based robots	autonomous living machines
associative learning	molecular circuits	synthetic biology	mathematical modelling	Hill equation	Pavlov’s dog	reinforcement	dissociation	nondimensionalisation
artificial intelligence	gene networks	synthetic biological circuits	synthetic biology	bio-artificial intelligence (BI)
Artificial intelligence; CRISPR-Cas; gut microbiome; nutraceutical; probiotics; synthetic biology	assisted synthetic biology	Clustered Regularly Interspaced Short Palindromic Repeats (CRISPR-Cas)
AI	infectious disease	pathogen	synthetic biology	anti-infective drug discovery. Reverse vaccinology	epidemiology	explainable ML	infection biology	pandemics	antimicrobial resistance
synthetic biology	quantitative synthetic biology	genome synthesis and assembly	DNA storage	molecular evolution	de novo design	computer-aided design	cell engineering	gene circuit	chassis cell	artificial intelligent (AI)	Biofoundry	cell-free synthetic biology
Foresight	biothreats	synthetic biology	risk landscape	risk mitigation	NATO
Synthetic biology	engineered biological systems	foundational technologies	open science	standardization	biorisks	biological risks
Biosecurity	synthetic biology	top-down governance	laissez-faire governance	stewardship governance	bioeconomy
Synthetic biology	Biological engineering	Enabling technologies	Survey	Intellectual property rights	Licensing	Regulation
Artificial Intelligence	Biotechnology	Deep Learning	Digital Transformation	Machine Learning	drug discovery	drug safety	functional and structural genomics	proteomics	metabolomics	pharmacology	pharmacogenetics	and pharmacogenomics	agricultural biotechnology	AI in forest biotechnology	AI in medical biotechnology	AI in Animal biotechnology	AI in bioinformatics	trustworthy AI	AI methods	Human-AI interfaces	AI ethics	AI fairness	AI trust	personalized medicine	disease prediction	biomedical image analysis	Digital Information Processing System	AI ecosystems
Risk assessment	Artificial intelligence	Biotechnology	Biosecurity	NASEM Framework	Tucker Framework	synthetic biology	vulnerabilities	deep learning	precision maladies	pathogens	engineered pathogens	AI systems	AAAS-FBI-UNICRI Framework	Tucker-Koblentz framework	biosecurity
Biofoundries	AI	synthetic biology	technology platforms	policy problems	bio-informational future	future	genome foundries	modular laboratory equipment	MIT Foundry	Gingko Bioworks	Amyris	the London Biofoundry	biological devices	productivity	Global Biofoundries Alliance (GBA)
Metabolic engineering	Synthetic biology	AI	automation	workflows	tools	Design-Build-Test-Learn (DTBL)	machine learning	testing	large-scale genetic designs	biomedical applications	biodesign rules	reprogramming living cells	complexity of living systems	product prototyping	commercial process validation	biomanufacturing	process engineering	high-throughput equipment
Synthetic biology	wetware codesign	biodesign automation	genetic circuits	engineered genetic circuits	AI	software	engineering framework	synthetic biological systems	DNA biofoundries	cloud laboratories	standards
Synthetic biology	machine learning	genetics	human genomics	synthetic genomics	bioengineering	biologists	DNA synthesis	biomanufacturing	design-build-test-learn (DBTL) cycle
Artificial intelligence	synthetic biology	epistemology of synthetic models	taxonomy of synthetic models	synthetic method	criteria of relevance
AI	applied computing	computational biology	computing methodologies	life and medical sciences	metabolic engineering	experiment automation	multimodality	design on living cells
Construction File (CF) specification	Python	ChatGPT	GPT-4	modularization	automation	collaboration	synthetic biology	AI	AI-assisted workflows	human-driven design
Biotechnology	catastrophic risks	synthetic biology	biosecurity	genetic engineering	dual-use capabilities	tools	preparedness	emerging technologies	viral genomes	recreating pathogens	resurrecting extinct species	infectious disease	biosurveillance	bioagents	bioweapons
Biotechnology	Emerging technologies	Synthetic biology	Regulations	Europe
Biosafety risks	workers	synthetic biology industry	manufacturing	biomanufacturing	biotechnology sector	USA	US economy	bioethics	risk mitigation	health surveillance	proactive risk management	prevention-through-design principles	dynamic guidance	adverse health effects	NIOSH	emerging technologies
Biopolitics	biocyborg	synthetic biology	human enhancement	gene editing	self-experimentation	biohacking	cyborg	chimerism	bioeconomy	human being	human species	hybridity	social practices	implantables	active medical devices	non-Darwinian human evolution
Bacteria	Bioengineering and biotechnology	Biotechnology	Circuits	Genetics	critique	biologization	practical solutions	real-world problems	synbio hype	tools	bioeconomy	industrialization	overspecialization	optimization	biofoundry
Synthetic biology	Biosafety	Biosecurity	Ethics	Genetic firewall	Genetic safeguard	Code of conduct	Governance regulation	iGEM	international genetically engineered machine competition	Biological and Toxin Weapons Convention (BWC)
synthetic biology	artificial life	biosafety	regulation and legislation	public health emergency response system	pandemic control strategies. Governance	biological risks	biorisks	food security	ecological sustainability	industrialization	pathogens	biosafety governance	biosecurity	USA	FDCA	CDC	NIH	DURC	pandemics	control
biotechnology	ELSI	policy	governance	safety-by-design	synthetic biology	ethical	legal	and social implications	risk	AI	technology modernization	technology advancement
regulation	EU	synthetic biology	biotechnology	containment	genetic engineering	regulatory frameworks	bioengineering	GM	GMO regulation	biosensor	synbio products	risk assessments
Synthetic biology	risk	governance	review	policy
synthetic biology	risks	regulation	governance	controversies
artificial intelligence; machine learning; drug discovery; virtual screening; QSAR; QSPR; algorithms; neural networks
Machine learning	bioelectronics	artificial technology	biological systems	bioelectrics	sensor data	actuator data	biological system responses
dual-use technologies	catastrophic risk	existential risk	threat intelligence	nanobiotechnology
artificial cells; artificial intelligence; artificial life; autopoiesis; chemical AI; cognition; synthetic biology; synthetic cells; semantic information; systems chemistry
topological data analysis	protein language models	protein engineering	deep learning and machine learning	ML	NLP	AI
Generative AI	biotechnology
dual use	dual-use policy CRISPR/Cas9	research of concern	ethics education	synthetic virology	gene-drive technology	human gene editing
DURC	LLMs	GPT-4	AI	biological misuse	risk	biorisk	biological design tools (BDTs)
LLMs	dual-use	democratized access	reverse genetics	DNA synthesis	LLM chatbots	robotic cloud laboratories	MIT	pandemic-class agents
Biorisk	LLMs	ML	AI	ML model misuse	dangerous bioagents	lab security measures	biomedical ML systems	bad actors	biomedical AI assistants	toxic compounds	mass misinformation campaigns	prompt engineering	online misinformation	machine-generated examples	red-teaming	sandboxed environments	BSL requirements	biosecurity safety level (BSL)	information security
Dual use	AI	drug discovery	toxic molecules
artificial intelligence; AstraZeneca	case study; ethics; governance; implementation; lessons learned; practice
Economics; Science	technology and society
Artificial intelligence; AI governance; policy instruments; state types; responsible research innovation; technology assessment
chatGPT	bioinformatics	alignment	literature mining	data analysis	method development	classroom	lifelong learning
biomedical literature	generative pre-trained language model	text generation	text mining	problem solving protocol	BioGPT
GeneGPT	augmentation	LLMs	biomedical information
Computational biology and bioinformatics	Health services	Medical research	Public health	LLMs	Large language models (LLMs)	OpenAI	ChatGPT	patient care	medical knowledge
Responsible Innovation	synthetic biology	interdisciplinarity	biocontainment	antibiotic resistance	lab escape	lab constructed genetic material
Synthetic biology	biopharma	generative AI	protein structure prediction	molecular docking	enzyme design	protein design	gene expression optimization	workflow optimization	fermentation technology	fermentation scale-up	biosecurity
Technology of compliance	responsible research and innovation	ethics of synthetic biology	xenobiology	governance of emerging technologies	Responsible Research and Innovation (RRI)	synthetic biology	public expectations	ethnography	interview data
Artificial intelligence	Synthetic biology	Artificial-natural	Biology	Synthetic method	engineering	epistemology
mechanistic modeling	machine learning	AI	systems biology	synthetic biology	metabolic engineering
Machine learning	Metabolic networks	Machine learning algorithms	Cell metabolism	Principal component analysis	Gene expression	Genomics	Metabolic pathways
AI	biology	artificial intelligence	reintegration	statistics	computational scientists	vision	challenges	barriers	fragmentation of biology
Algorithms	Biology	Genetics	Machine learning	Synthetic biology
Federated learning	MELLODY	pharma	crosspharma datasets	pharmacodynamics	pharmacokinetics	Quantitative Structure Activity Relationship (QSAR) models	machine learning	ML
Synthetic biology	living therapeutics	biologics	genetically engineered cells	synthetic gene circuits	biomarkers	biological sensing	engineered cell	therapeutic function	human diseases	diseases
Ageing	Computer modelling	Drug discovery	Machine learning	Senescence	bioinformatics
Artificial intelligence	Biotechnology	Graph neural networks	Molecule representation	Reinforcement learning	Drug discovery	Molecular dynamics simulation
Biotechnology	nanobiotechnology	biocircuits	standardized biological building blocks	synthetic biology	engineered cells	synthetic DNA circuits	biomedical applications	optogenetics	engineered live therapeutics	artificial intelligence	AI
Artificial intelligence in medicine	history	Research challenges	Barriers to success	Sociocultural and cognitive factors	AI
Synthetic biology	AI
Synthetic biology	AI	automation	bioeconomy
synthetic biology	biosystem	future trends and developments	biodesign automation	responsible research and innovation (RRI)
Synthetic biology	transformation	future	futurist	foresight	products	fermentation	systems	cells as products	engineered biology
Bayesian inference	Machine learning	Metabolic engineering	Synthetic biology	Automated Recommendation Tool (ART)
Quantitative synthetic biology	AI	biofoundries	DNA storage	gene editing
ChatGPT	large language model (LLM)	transformer	GPT	disruptive technology	artificial intelligence	AI	disciplines	healthcare
chatGPT	computational biology	tips	tool	cleanup data	engineer prompts	summarization	AI tools
ChatGPT	Language modelGPT-3.5	Generative AI	Conversational AI	Context understanding	Natural language processing
Generative artificial intelligence	Large language models	Foundation models	AI ethics	Augmented human intelligence	Information management	AI trustworthiness
Generative AI	science	scientists	scientific findings	augmentation	concerns	literature review	coding	discovery	communication	mitigation	negative side-effects	intentional misappropriation
Biomedical engineering	Data integration	Machine learning
Generative models	AI	drug discovery	drug development challenges	multimodal deep generative models
artificial intelligence	biotechnology	agriculture	medicine	crop yield	life science	metabolic pathways	bio-based industrial setup	bio-based industry	bioengineering
Health care	machine learning	AI	human intelligence	artificial intelligence	AI in life science	genomics	multi-omics datasets
Machine learning	deep learning	systems biology	synthetic biology	network biology	neural networks	biological networks	microbiome research	disease biology	gene circuits	synthetic gene circuits	synthetic circuit	biomedical applications	fundamental design principles	synthetic gene networks
artificial intelligence	AstraZeneca	case study	ethics	governance	implementation	lessons learned	practice
synthetic biology	biosafety	biosecurity	ethics	dual-use	public health	policy	ethical	legal	and social issue (ELSI)	responsible innovation	dual-use research of concern (DURC)
Dual-use	dual-use research of concern (DURC). Legislation	Israel	USA	China	policy
Synthetic biology	Biosecurity risk	Regulation and management	Source	Suggestion	synbio	biosafety	biosecurity	GMO	China	risk assessment	standard	biosafety standards	labs
dual-use research of concern (DURC)	global governance	decentralized governance architectures	bottom-up strategies	WHO
Biological risk	life science	Asilomar	U.S. biosafety	policy	regulation	gain-of-function	viral pathogens	gene drives	security risks
Pathogens	oversight	governance	policy reset	convergence	DURC	dual-use research of concern (DURC)
Synthetic life	artificial life	national security	public discourse	synthetic biology	risks	U.S. National Science Advisory Board for Biosecurity (NSABB)
Synthetic biology	Biosecurity	Risk management	Governance systems	International collaboration	aggravation of species with complex gene modifications	threats to species diversity	abuse of biological weapons	laboratory leaks	and man-made mutations	China
Dual-use	pandemics	synthetic biology	artificial intelligence	LLMs	gene therapy	wildlife virus discovery	viral engineering for vaccine design	viral engineering for gene therapy	management of dual-use virological research	mitigation regimes	tiered dual-use scores
Biosecurity	threats	social context	machine intelligence	AI	biological weapons	compliance	dual use	dual use research	security governance	pathogens	curiosity-based system
Synthetic biology	Biosafety	Biosecurity	Structural topic model	Governance of emerging technologies	synbio	China	safety research	policy implications	synbio safety
Bioremediation	Environmental biotechnology	Synthetic biology	standards	biosafety	standardization	biosafety standardization	biosecurity	biocontainment
synthetic biology	participant safety	biosafety risks	biosecurity risks	ethical governance	public policy	biomedicine	China
Biosecurity	synthetic biology	education	Australia Group	export controls	dual use	biological engineering	International Genetically Engineered Machine competition (iGEM)	iGEM	biosecurity procedures
Biosecurity	synthetic biology	bioterrorism	non-state actors	potential misusers	non-state organizations	bioweapons	anthrax	botulinum toxin	oversight	security
Synthetic Biology	Technical Expertise Required	National Science Advisory Board For Biosecurity (NSABB)	Biological Weapons Development	Hazardous Biological Materials	biosafety	toxins	policy	safety	security	public interest
large language models (LLMs)	GPT-4	SimulateGPT	biomedical applications	biological simulators	complex living systems
Cancer	Cancer microenvironment	Cancer prevention	synbio	bioengineering	synthetic biology	immunotherapy	drug development	BCiT	genetic engineering	genetic circuits	bacteria-based cancer immunotherapy (BCiT)	bacteria	S. typhimurium	E. coli
adaptive risk management	biosafety	biosecurity	emerging technology	iGEM	reflexive risk management	risk management	synthetic biology
biosafety	biosecurity	biological material	biological agent	containment	regulations	(bio)risk assessment
digital revolution; sustainability challenges; governance strategies	laissez-faire	industry-driven approach	precautionary approach	preemptive strategy	stewardship
synthetic biology	living modified organisms	Cartagena Protocol on Biosafety	Nagoya Protocol on Access and Benefit Sharing	risk assessment	gene drives	digital sequence information	biotechnology regulation
Synthetic genomics	synthetic biology	genome minimization	bottom-up	top-dow
AI revolutions	biology	protein folding	AlphaFold	structural biology	experimental structural biology	protein fold predictions	DeepMind	European Bioinformatics Institute (EBI)	RoseTTAfold	deep learning	AI	experiments	AI dependence	AI in science	drug discovery
DNA synthesis	synthetic genomes	biosecurity	biomanufacturing	designer genes	regulation	business models	design-build-test cycle
Biological sciences	Systems biology	Genomics	safety by design	biosafety	biosecurity	synthetic genomics	bioeconomy	regulatory frameworks	technology frameworks	risks	technology readiness levels	synthetic DNA	synthetic DNA of concerns	sequence screening	genetic biocontainment systems	environmental proliferation	DNA synthesis	synthetic yeast	synthetic eukaryotic genome	designer genomes	biofoundries	DIY BIO	International Gene Synthesis Consortium (IGSC)	environmental metagenomics	suicide genes	biocontainment
Synthetic biology	bioengineering	synthetic genome	gene editing	bacterial artificial chromosomes (BACs)	multiplex automated genome engineering (MAGE)
mRNA-based therapeutics	mRNA vaccines	synthetic biology	self-assembled nanoparticles	logic gates
mRNA-based therapeutics	mRNA vaccines	synthetic biology	self-assembled nanoparticles	logic gates
Microbial ecology	Synthetic biology	designer yeasts
Synthetic yeast	biodesign; biodiversity; biofoundry; consilience; engineering biology; fermentation; scientific method; synthetic genomics; timeline; yeast	foresight	history of science	world’ greatest challenges
Microbiome	Metagenomics	Artificial intelligence	Human health	Diseases
synthetic biology	social sciences	bioethical concerns	playing God	biosecurity	biosafety	governance	stakeholders
Automation	synthetic biology	work of the future	future of work	technological futures	Science and technology studies	STS	skilled work	troubleshooting	temporality	laboratory work	interviews	laboratory technicians	ethnography	efficiency	digital infrastructure	robotic infrastructure	workflow	innovation	quality control	maintenance
Biomarkers	Cancer	Drug delivery	Genetic engineering	machine learning	computational biology
Responsible research and innovation	RI	research governance	synthetic biology	public engagement	UK	reflexivity	RI institutionalization
Emerging technology	Synthetic biology	Bibliometric analysis	Search strategy	Map of science	Research sponsors
Entrepreneurial ecosystems	Ecosystem emergence	Complex adaptive systems	Enabling technologies	Synthetic biology
Synthetic biology	innovation governance	EU	science and technology studies (STS)	Responsible innovation (RI)	synbio	governance continuum	participatory governance
Biodesign	Design fiction	Futures studies	Scenario visualization	worldbuilding	plant metabolites	microalgae	scenario
Anthropology	synthetic biology	iGEM	students	genetic engineering tools	competition
Risk ethics	climate change	technofix	Negative Emissions Technologies (NETs)	Synthetic Biology	IPCC	uncertainty
Open-source biotechnology	Intellectual property	Bio-hacking	DIYbio	Synthetic biology	Life patenting	anti-commons crisis	Do-It-Yourself biology	IP rights	dual-use device	dual-use systems
Synthetic biology	conservation	book review
Automation	Digitalization	Synthetic biology	Practice	Work	Labor
Space missions	Space settlement	Human enhancement	Gene editing	CRISPR	Synthetic biology	Bioethics	implants	ethics
Innovation intermediaries	Responsible innovation	Technological convergence	sustainability	governance	AI	AI-enabled engineering	AI	convergence	biomanufacturing	bioeconomy	synthetic biology	engineering biology	applications	digital-enabled transformation	design-build-test systems
Machine Learning	Metabolic Engineering	Synthetic Biology	Deep Learning	practitioners	engineers	scale-up	future perspectives	metabolic engineers	biochemists	microbiologists	computer scientists	electrical engineers	chemical engineers	mathematicians	statisticians	physicists	AI
Innovation intermediaries	Public biofoundries	Engineering biology	Translation	Sustainability	Responsibility
Dual-usescience	Biosecurity	Bioethics	Molecular biology	synthetic biology	iGEM	self-regulatory approach
Biomodifying technologies	regulation	adaptive regulation	societal governance	governance	gene editing	induced pluripotent stem cells	bioprinting	applications	lab-grown meat	pest control	medicine	assessment schemes	regulatory flexibility	stakeholder engagement	biomodification	global observatory model	biotechnology	legislative flexibility
Biowarfare	synthetic biology
DiY laboratories	STI policy	science	technology	and innovation (STI) policy
Bioinformational diplomacy	cyberbiosecurity	COVID-19	bioinformational secrecy	security dilemma	bioinformational dilemma	bioinformation	security	national security	diplomacy	global public health	emergencies	global public health emergencies
Synthetic biology	technoscience	biotechnology debates	media frames	social progress	innovation	ethics	EU	EU FP7	Synergene	public policy	STS	risk	risk frame	biosafety	biosecurity risks	public dialogue	social engagement	technology policy	technology optimism	meta-frames	DIY-biology	NEST-ethics	synbio	Responsible Research and Innovation (RRI)	bio-capitalism	social progress frame	science frame	ethics frame
microbial production; bioethanol; biodiesel; SynB; food security; information science; scientometry
GAIA	AI assistants	GPT-4	AI benchmarks	fundamental abilities	reasoning	multi-modality handling	web browsing	tool-use proficiency	AGI	Artificial General Intelligence	LLMs
Bioeconomy	synthetic biology	marketplace	DNA synthesis	Twist Bioscience	foundry	biofoundry	Ginkgo Bioworks	iGEM
Synthetic biology	genetic engineering	metabolic engineering	artificial cell	model-driven design	cell-free approaches	MAGE	feedback control	optimization	system control	modularity	standardization
metabolic engineering	synthetic cells	regulatory circuits	synthetic genome	Design–Build–Test–Learn cycle	standardization	biomaterials	plug-and-play	off-the-shelf bioparts	bioparts
Synthetic biology	citizens	groups of concern	experiments of concern	governance	USA	UK	DNA technology	recombinant DNA technology	self-governance mechanisms	sociotechnical imaginaries	risks	national approaches	Asilomar
biotechnology	industry	synthetic biology	startups	technology stack	open technology sharing	democratization	multinational corporations	technology monopolies	manufacturing revolution	biotechnology products	living therapies	synthetic biology market	biotechnology industry	biopharma industry
SynBio	South America	DIY	Latin America	TECNOx	Open science
Synthetic biology	drug discovery	impact	DNA synthesis	data science	workflows	AI	machine learning
STS	roadmap	UK	framing	responsible research and innovation (RRI)	science and society	STS in policy	STS researchers	policy process	roadmapping	technological innovation	economic progress
Synthetic biology	emerging biotechnologies	environmental engineering	remediation	waste treatment	risks	complexities	risk perception	risk assessment	ethics	engineering	environmental engineers	preventive approach
Algorithms	AI	biology	machine learning	RNA biology	bioinformatics	RNA structure prediction
CO2 fixation pathway	CO2 sequestration	Metabolic engineering	Synthetic biology	System biology	Bioproducts	global warming	renewable energy source	microbial cell factories	biocommodities	carbon sequestration
microRNA	RNAi	Drosha	Argonaute	biogenesis	super-enhancer	disease pathogenesis	synthetic biology
microRNA	miRNA regulation	pathways	biological networks	systems biology	miRNA prioritization	pathway analysis	bioinformatics	computational biology	statistical models
Desorptive capacity	exploration & exploitation	management innovation	emerging technology domains	synthetic biology	commercial risks	technology commercialization	synthetic biology organizations	External technology commercialisation (ETC)	positive network externalities
Bioeconomy	governance	synthetic biology
Science & technology and innovation policy studies	foresight	radical/disruptive innovation	industrial biotechnology
Entrepreneurship	leadership	entrepreneurial leadership	DIY innovation	laboratories	synthetic biology	machine learning	office automation	technological competence
Do-It-Yourself laboratory (DIY)	Science technology and innovation (STI)	systematic literature review	DIY activities
Do-it-yourself	DiY laboratories	innovation diffusion	digital innovation
Innovation studies	risk analysis and technology	technology & innovation studies	public understanding of science and technology
Regulation	biotechnology	DNA	UK	recombinant DNA	laboratory work	laboratory safety	workers rights	epistemic cultures	regulatory space	deregulation
Artificial intelligence; catastrophic risk; existential risk; nuclear war; synthetic biology; United Nations
Assisted evolution	ecological restoration	synthetic biology	Nature 4.0	re-create nature	biodiversity	cultural risks	ecological risks	risks	de-extinct species	environmentalists	conservationists	ecological restoration technologies
Automation	ecology	robotics	reengineering of nature	synthetic biology	climate breakdown	anthropocene	operational ecologies	critical geography	automation studies	political ecology
Deep learning	materials discovery	applications
Synthetic biology	materials design	genetic circuits	smart living materials	living sensors	therapeutics	electronics	programmable living materials	biomimicry	biomaterials	AI	machine learning
Biomaterial	biocompatibility	databases	artificial intelligence	data mining	natural language processing	international organization for standardization (ISO)
Interactive materials	Engineered living materials	Metabolic engineering	Cell encapsulation	Nanomaterials	Smart materials	Stimulus-responsive materials	AI	machine learning	synthetic biology	materials sciences
Digitalization	Digital twins FDA	QbD	Regulatory considerations	bioprocessing	biotech	synthetic biology	biopharmaceuticals
Genetically modified organisms (GMOs)	Biocontainment	Biosecurity	Synthetic biology	Molecular biology	Biotechnology
Safety-by-designs	synthetic biology	genetic safeguards	biocontainment	biosafety	auxotrophy	semantic containment	combinatorial systems
Synthetic biology	engineered microorganisms	synthetic bugs	xenobiology	certainty-of-containment	gene drive	standardized metrics
Executive order	Biomanufacturing	Biotechnology	Next generation	Disruptive research	Diversity	equity and inclusion	International collaboration	Biosecurity	biosafety and bioethics	Data sharing	Global issue	GMO	CRISPR	USA	Dual Use Research of Concern (DURC)	antibiotic resistance genes (ARGs)	genetically engineered microbes (GEMs)	user-friendly interfaces	DEI
Synthetic biology	Ethical framework	Biosafety	Precautionary principle	Environmental risks
synthetic biology	cell-free synthetic biology	systems biology	protein synthesis	metabolic engineering	biomaterials	machine learning	AI
Cell-free systems (CFS)	synthetic biology	AI rational design	genetically programmable tools	in vitro platforms	centralized production	high-value commodities	unexpected outcomes	creative outcomes	nano-scale materials	engineered enzymes	machine learning
Synthetic biology	molecular engineering	policy. Flourishing	minimising the downsides	global forum	COVID-19	dual-use	governance
GMOs	recombinant DNA	genetic implant	traceability	containment	barcoding	digital twins	watermarking	DNA steganography	Pseudomonas putida	synbio chassis	generally regarded as safe (GRAS)	environmental risk assessment (ERA)
Bioeconomy	M&A	digital economy	convergence literature	coupling transition theory
Innovation types	Bioeconomy	Circular economy	Sustainability	Sustainability-oriented innovation	Bio-based production	synthetic biology
Bioeconomy	systemic challenge	policy	innovation	food security	energy security	climate resilience	politics	political economy	transition	industrial manufacturing	agriculture	forestry	marine resources	waste management	renewable carbon strategy	land usage	industry policy	taxation	direct market intervention	mandated production	biofuels	value chain policies	gas fermentation	hydrogen production	technology risk	public funding	scale-up facilities	OECD	Norway

## Sheet: All Keywords
		Clusters	Number of clusters
(bio)risk assessment
abuse of biological weapons
active medical devices
actuator data
adaptive regulation
adaptive risk management
adverse health effects
Ageing
aggravation of species with complex gene modifications
AGI
agriculture
agriculture
AI
AI
AI		AI	1
AI
AI
AI
AI
AI
AI
AI
AI
AI
AI
AI
AI
AI
AI
AI
AI
AI
AI
AI
AI
AI
AI
AI
AI
AI
AI
AI
AI
AI
AI
AI
AI
AI assistants
AI benchmarks
AI dependence
AI ethics
AI ethics
AI ethics
AI for health
AI governance
AI governance
AI governance
AI guardrails
AI in Animal biotechnology
AI in bioinformatics
AI in cancer
AI in forest biotechnology
AI in healthcare
AI in life science
AI in medical biotechnology
AI in medicine
AI in oncology
AI in precision oncology
AI in radiomics
AI in science
AI methods
AI rational design
AI revolutions
AI system
AI systems
AI systems
AI tools
AI trustworthiness
AI-assisted workflows
AI-bio capabilities
AI-enabled engineering
AI-enabled tools for the life sciences
AI-optimization algorithms
AI;
Algorithms
Algorithms
algorithms
algorithms
alignment
AlphaFold
Amyris
and innovation (STI) policy
and man-made mutations
and pharmacogenomics
and social implications
and social issue (ELSI)
animal
anthrax
anthropocene
Anthropology
anti-commons crisis
anti-infective drug discovery. Reverse vaccinology
antibiotic resistance
antibiotic resistance genes (ARGs)
antimicrobial resistance
applicability domain
applications
applications
applications
applied computing
Applied computing
applied microbiology
applied science
Argonaute
artificial
artificial
artificial
artificial
artificial
artificial cell
artificial cell factories
Artificial General Intelligence
Artificial Intelligence												AI fairness	AI trust	personalized medicine	disease prediction	biomedical image analysis	Digital Information Processing System	AI ecosystems
Artificial intelligence
Artificial intelligence
Artificial intelligence		Artificial intelligence	1
artificial intelligence
artificial intelligence
Artificial intelligence
artificial intelligence
Artificial intelligence
Artificial intelligence
artificial intelligence
artificial intelligence
artificial intelligence
artificial intelligence
artificial intelligence
artificial intelligence
artificial intelligence
Artificial intelligence
artificial intelligence
Artificial intelligence
artificial intelligence
Artificial intelligence
Artificial intelligence
artificial intelligence
artificial intelligence
artificial intelligence
Artificial intelligence (AI)
artificial intelligence (AI)
Artificial intelligence in medicine
artificial intelligence; AstraZeneca
artificial intelligent (AI)
artificial life
artificial life
artificial neural network
artificial technology
Artificial-natural
Asilomar
Asilomar
assessment schemes
Assisted evolution
assisted synthetic biology
associative learning
AstraZeneca
augmentation
augmentation
Augmented human intelligence
Australia Group
Automated Recommendation Tool (ART)
Automation
Automation		Automation	1
automation
automation
automation
Automation
automation studies
autonomous decision-making
autonomous drug designing
autonomous living machines
autopoiesis;
auxotrophy
Bacteria
bacteria
bacteria-based cancer immunotherapy (BCiT)
bacterial artificial chromosomes (BACs)
bad actors
barcoding
barriers
Barriers to success
basic science
Bayesian inference
BCiT
benevolence
bibliometric
Bibliometric analysis
bibliometrics
bio-artificial intelligence (BI)
bio-based industrial setup
bio-based industry
Bio-based production
bio-capitalism
Bio-hacking
bio-informational future
bioagents
biochemists
biocircuits
biocommodities
biocompatibility
Biocontainment		Biocontainment	1
biocontainment
biocontainment
biocontainment
biocontainment
biocyborg
biodegradation
Biodesign
biodesign
biodesign automation
biodesign automation
biodesign rules
biodiesel
biodiversity
biodiversity
Bioeconomy
Bioeconomy
Bioeconomy		Bioeconomy	1
Bioeconomy
bioeconomy
bioeconomy
bioeconomy
bioeconomy
bioeconomy
bioeconomy
Bioeconomy
bioelectrics
bioelectronics
bioengineering
bioengineering
bioengineering
bioengineering
bioengineering
bioengineering
Bioengineering and biotechnology
bioengineering;
bioengineering;
bioethanol
bioethical concerns
Bioethics		Bioethics	1
Bioethics
bioethics
bioethics
Biofoundries		Biofoundries	1
biofoundries
biofoundries
biofoundry
Biofoundry
biofoundry
biofoundry
biofuels
biogenesis
BioGPT
biohacking
biohybrid robotics
biohybrid;
bioinformatics
bioinformatics
bioinformatics
bioinformatics		bioinformatics	1
bioinformation
bioinformational dilemma
Bioinformational diplomacy
bioinformational secrecy
biological agent
biological agents
Biological and Toxin Weapons Convention (BWC)
biological catastrophe
biological design tools (BDTs)
Biological diversity
Biological engineering
biological engineering
biological engineering
biological material
biological misuse
biological networks
biological networks
Biological risk		Biological risk	1
biological risks
biological risks
Biological sciences
biological sensing
biological simulators
biological system responses
biological systems
biological systems
biological weapons
Biological Weapons Development
biologics
biologists
biologization
biology
Biology
biology
biology
Biology		Biology	1
biology
biology;
biology;
biology;
biology;
biology;
biology;
Biomanufacturing		Biomanufacturing	1
biomanufacturing
biomanufacturing
biomanufacturing
biomanufacturing
biomanufacturing
biomanufacturing
biomanufacturing
biomanufacturing
biomarker recognition
Biomarkers
biomarkers
Biomaterial
biomaterials		biomaterials	1
biomaterials
biomaterials
biomedical AI assistants
biomedical applications
biomedical applications
biomedical applications
biomedical applications
biomedical datasets
Biomedical engineering
biomedical information
biomedical literature
biomedical ML systems
biomedicine
biomimetics
biomimicry
biomodification
Biomodifying technologies
bioorganic chemistry
bioparts
biopharma
biopharma industry
biopharmaceuticals
Biopolitics
bioprinting
bioprocessing
Bioproducts
Bioremediation
Biorisk		Biorisk	1
biorisk
biorisks
biorisks
biorobot;
biosafety
Biosafety		Biosafety	1
biosafety
Biosafety
biosafety
Biosafety
biosafety
biosafety
biosafety
biosafety
biosafety
biosafety
biosafety
biosafety
biosafety and bioethics
biosafety governance
Biosafety risks
biosafety risks
biosafety standardization
biosafety standards
bioscience
Biosecurity		Biosecurity	1
Biosecurity
Biosecurity
Biosecurity
Biosecurity
biosecurity
Biosecurity
biosecurity
Biosecurity
biosecurity
biosecurity
Biosecurity
Biosecurity
Biosecurity
biosecurity
biosecurity
biosecurity
biosecurity
biosecurity
Biosecurity
biosecurity
biosecurity
biosecurity
biosecurity
biosecurity procedures
Biosecurity risk
biosecurity risks
biosecurity risks
biosecurity safety level (BSL)
biosensing
biosensor
biosurveillance
biosystem
biotech
Biotechnology		Biotechnology	1
Biotechnology
biotechnology
Biotechnology
Biotechnology
Biotechnology
biotechnology
Biotechnology
biotechnology
biotechnology
Biotechnology
Biotechnology
Biotechnology
biotechnology
Biotechnology
biotechnology
biotechnology
biotechnology
biotechnology debates
biotechnology industry
biotechnology products
biotechnology regulation
biotechnology sector
bioterrorism
bioterrorism
biothreats
Biowarfare
bioweapons
bioweapons
book review
bottom-up
bottom-up strategies
botulinum toxin
BSL requirements
business models
Cancer
Cancer
cancer
Cancer microenvironment
Cancer prevention
cap;
carbon sequestration
Cartagena Protocol on Biosafety
case study
case study
catastrophic risk		catastrophic risk	1
catastrophic risk;
catastrophic risks
CDC
Cell encapsulation
cell engineering
cell factories
Cell metabolism
cell signaling
cell therapy
cell-free approaches
cell-free synthetic biology
cell-free synthetic biology
Cell-free systems (CFS)
cells as products
cells;
cells;
centralized production
certainty-of-containment
challenges
chassis cell
chatGPT		chatGPT	1
chatGPT
chatGPT
ChatGPT
chatGPT
ChatGPT
ChatGPT
ChatGPT
chemical
chemical engineers
chemistry
chemistry automation
chimerism
China		China	1
China
China
China
China
Circuits
Circular economy
citizens
civil society
classroom
cleanup data
climate breakdown
climate change
climate resilience
clinical workflow
cloud laboratories
Clustered Regularly Interspaced Short Palindromic Repeats (CRISPR-Cas)
CO2 fixation pathway
CO2 sequestration
Code of conduct
coding
collaboration
combinatorial systems
commercial process validation
commercial risks
communication
competition
Complex adaptive systems
complex living systems
complexities
compliance
compound libraries
computational biology
computational biology
computational biology
computational biology		computational biology	1
Computational biology and bioinformatics
computational scientists
computer
computer
Computer modelling
computer-aided design
computing methodologies
concerns
conservation		conservation	1
conservation
conservationist synthetic biology
conservationists
consilience
Construction File (CF) specification
consultation
containment
containment
containment
Context understanding
control
controversies
Convention on Biological Diversity (CBD)
Convergence		Convergence	1
convergence
convergence
convergence
convergence literature
conversation with chatGPT
Conversational AI
core promoter
coupling transition theory
COVID-19
COVID-19
creative outcomes
CRISPR		CRISPR	1
CRISPR
CRISPR
CRISPR-Cas
criteria of relevance
critical geography
critique
crop yield
crosspharma datasets
cultural risks
curiosity-based system
cyberbiosecurity
cyborg
cyborg;
dangerous bioagents
data analysis
Data integration
data mining
data science
Data sharing
databases
de novo design
de-extinct species
decentralized governance architectures
Decision analysis
decision-making
Deep learning		Deep learning	1
deep learning
Deep Learning
Deep Learning
deep learning
deep learning
deep learning
deep learning
deep learning and machine learning
DeepMind
DEI
democratization
democratized access
deregulation
Design fiction
design on living cells
design-build-test cycle
design-build-test systems
design-build-test-learn (DBTL) cycle
Design-Build-Test-Learn (DTBL)		Design-Build-Test-Learn (DTBL)	1
Design–Build–Test–Learn cycle
designer genes
designer genomes
designer yeasts
Desorptive capacity
developmental
developmental
digital economy
digital infrastructure
digital innovation
digital minds
digital revolution
digital sequence information
Digital Transformation
digital twins
Digital twins FDA
digital-enabled transformation
Digitalization
Digitalization
diplomacy
direct market intervention
disciplines
discovery
disease biology
disease diagnostics
disease pathogenesis
Diseases		Diseases	1
diseases
Disruptive research
disruptive technologies
disruptive technology
dissociation
Diversity
DIY
DIY activities
DIY BIO
DIY innovation
DiY laboratories		DiY laboratories	1
DiY laboratories
DIY-biology
DIYbio
DNA
DNA biofoundries
DNA steganography
DNA storage
DNA storage
DNA synthesis
DNA synthesis		DNA synthesis	1
DNA synthesis
DNA synthesis
DNA synthesis
DNA synthesis
DNA technology
Do-it-yourself
Do-It-Yourself biology
Do-It-Yourself laboratory (DIY)
Drosha
Drosophila
Drug delivery
drug design
drug design
drug development
drug development challenges
drug discovery
drug discovery
drug discovery
Drug discovery		Drug discovery	1
drug discovery
drug discovery
Drug discovery
drug discovery
drug research and development
drug safety
drug-design
Drugs
dual use
Dual use
dual use
dual use
dual use research
Dual Use Research of Concern (DURC)		Dual Use Research of Concern (DURC)	1
Dual Use Research of Concern (DURC) framework		Dual-use	1
Dual-use
Dual-use
dual-use
Dual-use
dual-use
dual-use
dual-use capabilities
dual-use device
dual-use policy CRISPR/Cas9
dual-use research of concern (DURC)
dual-use research of concern (DURC)
dual-use research of concern (DURC)
dual-use research of concern (DURC). Legislation			1
dual-use systems
dual-use technologies
Dual-usescience
DURC
DURC
DURC
DURC
dynamic guidance
E. coli
ecological restoration
ecological restoration technologies
ecological risks
ecological sustainability
ecology
Economics; Science
Ecosystem emergence
education
efficiency
electrical engineers
electronics
ELSI
ELSI/A
embryo;
emergencies
emergent self-organization
emerging biotechnologies		Emerging technologies	1
Emerging technologies
emerging technologies
emerging technologies
emerging technologies
emerging technologies
Emerging technology
emerging technology
emerging technology domains
Enabling technologies
Enabling technologies
Endocrine-disrupting chemicals (EDCs)
energy security
engineer prompts
engineered biological systems
engineered biology
engineered cell
engineered cells
engineered enzymes
engineered genetic circuits
engineered live therapeutics
Engineered living materials
engineered microorganisms
engineered pathogens
engineering
engineering
Engineering biology		Engineering biology	1
engineering biology
engineering biology
engineering framework
engineers
Entrepreneurial ecosystems
entrepreneurial leadership
Entrepreneurship
Environmental biotechnology
environmental engineering
environmental engineers
environmental metagenomics
environmental proliferation
environmental risk assessment (ERA)
Environmental risks		Environmental risks	1
environmental risks
environmentalists
enzyme design
epidemiology
epistemic cultures
epistemology
epistemology of synthetic models
equity and inclusion
ethical
ethical
Ethical framework
ethical governance
Ethics		Ethics	1
ethics
ethics
ethics
ethics
ethics
ethics
ethics education
ethics frame
ethics of synthetic biology
ethnography
ethnography
EU
EU
EU
EU
EU FP7
EU Framework Programme for Research and Innovation
Europe
European Bioinformatics Institute (EBI)
evolution;
evolutionary cell biology
Executive order
existential risk
experiment automation
experimental approaches
experimental structural biology
experiments
experiments of concern
explainable ML
exploration & exploitation
export controls
External technology commercialisation (ETC)
FDCA
feature selection
Federated learning
feedback control
fermentation		fermentation	1
fermentation
fermentation scale-up
fermentation technology
Fink report
Food industry
food security
food security
food security
food-related substances
Forbidden knowledge
Foresight		Foresight	1
foresight
foresight
foresight
forestry
Foundation models
foundational technologies
foundry
fragmentation of biology
framing
functional and structural genomics
functional genomics
fundamental abilities
fundamental design principles
future
future
future of work
future perspectives
future trends and developments
Futures studies
futurist
GAIA
gain-of-function
gain-of-function (GOF)
gas fermentation
gene circuit
gene circuits
gene drive		gene drives	1
gene drives
gene drives
gene drives
gene editing
Gene editing		Gene editing	1
gene editing
gene editing
gene editing
Gene expression
gene expression
gene expression optimization
gene networks
gene therapy
gene-drive technology
GeneGPT
generally regarded as safe (GRAS)
Generative AI		Generative AI	1
generative AI
Generative AI
generative AI
Generative AI
Generative artificial intelligence
Generative models
generative pre-trained language model
genetic biocontainment systems
genetic circuits		genetic circuits	1
genetic circuits
genetic circuits
genetic engineering
Genetic engineering		Genetic engineering	1
genetic engineering
genetic engineering
genetic engineering
genetic engineering tools
Genetic firewall
genetic implant
Genetic safeguard
genetic safeguards
genetic variants
genetically engineered cells
genetically engineered microbes (GEMs)
Genetically modified organisms (GMOs)
genetically programmable tools
Genetics
genetics
Genetics
genome annotation
genome foundries
genome minimization
genome synthesis and assembly
Genome-editing
Genomics
Genomics
genomics
Gingko Bioworks
Ginkgo Bioworks
Global Biofoundries Alliance (GBA)
global challenges
global forum
global governance
Global issue
global observatory model
global public health
global public health emergencies
global warming
GM
GMO
GMO
GMO regulation
GMOs
governance
governance
governance
governance
Governance
Governance		Governance	1
governance
governance
governance
governance
governance
governance
governance
governance
governance
governance
governance continuum
governance of emerging technologies
Governance of emerging technologies
Governance regulation
governance strategies
Governance systems
GPT
GPT-4		GPT-4	1
GPT-4
GPT-4
GPT-4
Graph neural networks
groups of concern
gut microbiome
Hazardous Biological Materials
Health care
Health services
health surveillance
healthcare
high-throughput equipment
high-throughput phenotyping
high-value commodities
Hill equation
history
history of science
holistic understanding
homo sapiens
Horizon 2020
hotspots
human being
human diseases
Human enhancement
human enhancement
human gene editing
human genomics
Human health
human intelligence
human intervention
human species
human trust
Human-AI interfaces
human-driven design
hybridity
hydrogen production
iGEM		iGEM	1
iGEM
iGEM
iGEM
iGEM
iGEM
immunotherapy
impact
implantables
implants
implementation
implementation
in vitro platforms
induced pluripotent stem cells
industrial biomanufacturing
industrial biotechnology		industrial biotechnology	1
industrial biotechnology
industrial manufacturing
industrialization
industrialization
industry
industry policy
industry-driven approach
infection biology
infectious disease
infectious disease
information extraction
Information management
information science
information security
information;
innovation		innovation	1
innovation
innovation
innovation diffusion
innovation governance
Innovation intermediaries
Innovation intermediaries
Innovation studies
Innovation types
Intellectual property
Intellectual property rights
intelligence;
intelligence;
intelligent machines
Intelligent medicine
intentional misappropriation
Interactive materials
interdisciplinarity
International collaboration
International collaboration
International Gene Synthesis Consortium (IGSC)
international genetically engineered machine competition
International Genetically Engineered Machine competition (iGEM)
international law
international organization for standardization (ISO)
interview data
interviews
IP rights
IPCC
Israel
key enabling technologies
Keywords
lab constructed genetic material
lab escape
lab security measures
lab-grown meat
Labor
laboratories
laboratory leaks
laboratory safety
laboratory technicians
laboratory work
laboratory work
labs
laissez-faire
laissez-faire governance
land usage
Language modelGPT-3.5
LLMs
large language model (LLM)
Large language models
large language models (LLMs)
Large language models (LLMs)		Large language models (LLMs)	1
large-scale genetic designs
Latin America
leadership
learning;
legal
legal
legislative flexibility
lessons learned
lessons learned
Licensing
life and medical sciences
Life patenting
life science
life science
life;
life;
lifelong learning
literature mining
literature review
living
living modified organisms
living sensors
living therapeutics
living therapies
LLM chatbots
LLMs		LLMs
LLMs
LLMs
LLMs
LLMs
LLMs
LLMs
LLMs
logic gates
logic gates
M&A
machine
machine intelligence
Machine learning		Machine learning	1
Machine learning
Machine learning
machine learning
machine learning
machine learning
Machine learning
machine learning
Machine learning
Machine learning
Machine learning
machine learning
Machine Learning
machine learning
machine learning
machine learning
machine learning
machine learning
machine learning
machine learning
Machine Learning						physicists	AI
machine learning
Machine learning
machine learning
machine learning
Machine learning
machine learning
machine learning (ML)
machine learning (ML)
machine learning (ML)
Machine learning algorithms
machine-generated examples
machines
MAGE
maintenance
malicious actors
management innovation
management of dual-use virological research
mandated production
manufacturing
manufacturing revolution
Map of science
marine resources
marketplace
mass misinformation campaigns
materials design
materials discovery		Materials	1
materials sciences
mathematical modelling
mathematicians
mechanistic modeling
media frames
medical applications
medical education
medical imaging diagnostics
medical knowledge
Medical research
medical research
medicine
MELLODY
meso-scale morpogenesis
meta-frames
Metabolic engineering		Metabolic engineering	1
metabolic engineering
Metabolic Engineering
Metabolic engineering
metabolic engineering
Metabolic engineering
Metabolic engineering
metabolic engineering
metabolic engineering
metabolic engineering
metabolic engineering
Metabolic engineering
metabolic engineers
Metabolic networks
metabolic pathways
metabolic pathways
Metabolic pathways
metabolomics
metabolomics
metagenome
Metagenomics
method development
microalgae
microbial cell factories
Microbial ecology
microbial production
microbiologists
Microbiome
microbiome research
microorganism bots
microorganisms
microRNA
microRNA
microRNA
minimal genome
minimising the downsides
miRNA prioritization
miRNA regulation
MIT
MIT Foundry
mitigation
mitigation regimes
ML
ML
ML
ML model misuse
model-driven design
modular cell therapy technologies
modular laboratory equipment
modularity
modularization
Molecular biology		Molecular biology	1
Molecular biology
molecular circuits
molecular de novo generation
molecular docking
Molecular dynamics simulation
molecular engineering
molecular evolution
molecular genetics
Molecule representation
morphogenesis
mRNA vaccines
mRNA vaccines
mRNA-based therapeutics
mRNA-based therapeutics
multi-modality handling
multi-omics		multi-omics	1
multi-omics datasets
multi-scale machines
multimodal
multimodal deep generative models
multimodality
multinational corporations
multiple realizability
multiplex automated genome engineering (MAGE)
Nagoya Protocol on Access and Benefit Sharing
nano-scale materials
nanobiotechnology
nanobiotechnology
Nanomaterials
Nanotechnology
NASEM Framework
national approaches
national law
National Science Advisory Board For Biosecurity (NSABB)
national security
national security		national security	1
National Security Advisory Board for Biosecurity (NSABB)
NATO
Natural language processing
natural language processing
natural language processing
natural language processing (NLP)
Nature 4.0
Negative Emissions Technologies (NETs)
negative side-effects
NEST-ethics
network biology
neural networks
neural networks
new life
Next generation
NIH
NIOSH
NLP
non-Darwinian human evolution
non-natural biosynthesis pathways
non-state actors
non-state organizations
nondimensionalisation
nuclear war
nutraceutical
OECD
of
off-the-shelf bioparts
office automation
online misinformation
open access
open science
Open science		Open science	1
open science
open technology sharing
Open-source biotechnology
OpenAI
OpenAI
operational ecologies
optimization
optimization
optogenetics
overloading
oversight
oversight
overspecialization
pan-genome
pandemic
pandemic control strategies. Governance
pandemic-class agents
pandemics		pandemics	1
pandemics
pandemics
participant safety
participatory governance
pathogen
Pathogens		Pathogens	1
pathogens
pathogens
pathogens
pathogens
pathogens
pathway analysis
pathway optimization
pathways
patient care
Pavlov’s dog
personhood
pest control
pharma
pharmacodynamics
pharmacogenetics
pharmacokinetics
pharmacology
philosophy
physical computing
plant metabolites
playing God
PloS
plug-and-play
policy
policy
policy
policy
Policy		Policy	1
policy
policy
policy
policy implications
policy instruments
policy problems
policy process
policy recommendations
policy reset
policy. Flourishing
political ecology
political economy
politics
polycomputing
positive network externalities
potential misusers
practical solutions
Practice
practice
practice
practitioners
precautionary approach
Precautionary principle
precautionary principle
precision maladies
precision medicine
precursor behaviors
predictive models
preemptive strategy
preparedness
prevention-through-design principles
preventive approach
Principal component analysis
proactive risk management
probiotics
problem solving protocol
process engineering
product prototyping
productivity
products
programmable living materials
prompt engineering
prompt engineering
property predictions
protein design		Proteins	1
protein engineering
protein fold predictions
protein folding
protein function
protein language models
protein structure prediction
protein structure prediction
protein synthesis
protein-protein interactions (PPIs)
proteomics
proteomics
Pseudomonas putida
Public biofoundries
public dialogue
public discourse
public engagement
public expectations
public funding
Public health
public health
public health emergency response system
public interest
public policy
public policy		public policy	1
public safety
public understanding of science and technology
Publication norms
PubMed
Python
QbD
QSAR
QSPR
quality control
Quantitative Structure Activity Relationship (QSAR) models
Quantitative synthetic biology
quantitative synthetic biology
radical/disruptive innovation
random forest model
re-create nature
real-world problems
reasoning
recombinant DNA
recombinant DNA
recombinant DNA technology
recreating pathogens
red-teaming
reengineering of nature
reflexive risk management
reflexivity
regenerative medicine
regenerative medicine
regulation
Regulation		Regulation	1
regulation
regulation
regulation
regulation
Regulation
regulation and legislation
Regulation and management
Regulations
regulations
Regulations
regulatory circuits
Regulatory considerations
regulatory flexibility
regulatory frameworks
regulatory frameworks
regulatory space
reinforcement
Reinforcement learning
reintegration
remediation
renewable carbon strategy
renewable energy source
reprogramming living cells
Research and Innovation (R & I)
Research challenges		Research	1
research gaps
research governance
research of concern
Research sponsors
Responsibility
responsible agroecology
responsible AI
Responsible Innovation
Responsible innovation
responsible innovation
Responsible innovation (RI)
Responsible research and innovation
responsible research and innovation
Responsible Research and Innovation (RRI)		Responsible Research and Innovation (RRI)	1
responsible research and innovation (RRI)
responsible research and innovation (RRI)
Responsible Research and Innovation (RRI)
responsible research and innovation (RRI)
Responsible Research and Innovation (RRI)
responsible research innovation
resurrecting extinct species
reverse genetics
review
RI
RI institutionalization
risk
risk
risk
risk
risk analysis and technology
Risk assessment		Risk assessment	1
Risk assessment
risk assessment
risk assessment
risk assessment
risk assessments
Risk ethics
risk frame
risk governance
risk landscape
Risk management
risk management
risk mitigation
risk mitigation
risk perception
risks
risks
risks
risks
risks
risks
RNA biology
RNA polymerase II
RNA structure prediction
RNA-based tools
RNAi
roadmap
roadmapping
robot
robot;
robotic cloud laboratories
robotic infrastructure
robotics
robotics
RoseTTAfold
S. typhimurium
Saccharomyces cerevisiae
safety
safety by design
safety research
safety-by-design
Safety-by-designs
sandboxed environments
sapient AIs
sapient beings
scale-up
scale-up facilities
scenario
Scenario visualization
science		Science	1
science
science
Science & technology and innovation policy studies
science and society
science and society
Science and technology studies
science and technology studies (STS)		science and technology studies (STS)	1
Science Citation Index Expanded
science frame
science policy
Science technology and innovation (STI)
science;
science;
science;
scientific findings
scientific method
Scientific Reports
scientists
scientometry
Search strategy
security
security
security		security	1
security dilemma
security governance
security risks
self-assembled nanoparticles
self-assembled nanoparticles
self-assembly		self-assembly	1
self-driving labs (SDLs)
self-experimentation
self-governance
self-governance mechanisms
self-regulatory approach
semantic
semantic containment
Senescence
sensor data
sequence screening
shared responsibility
signaling motifs
SimulateGPT
skilled work
smart living materials
Smart materials
social context
social engagement
social practices
social progress
social progress frame
social sciences
societal governance
Sociocultural and cognitive factors
sociotechnical imaginaries
software
Source
South America
Space missions
Space settlement
sperm-bots
stakeholder engagement
stakeholders
standard
standardization		standardization	1
standardization
standardization
standardization
standardized biological building blocks
standardized metrics
standards
standards
startups
state types
statistical learning model
statistical models
statisticians
statistics
stewardship
stewardship governance
STI policy
Stimulus-responsive materials
strain engineering
structural biology
Structural topic model
STS
STS
STS
STS in policy
STS researchers
students
Suggestion
suicide genes
summarization
super-enhancer
supernumerary neochromosome
Survey
sustainability
Sustainability		Sustainability	1
Sustainability
sustainability challenges
Sustainability-oriented innovation
SynB
Synbio		Synbio	1
SynBio
synbio
synbio
synbio
synbio
synbio
synbio applications
synbio chassis
synbio governance
synbio hype
synbio products
synbio safety
Synergene
synthetic
synthetic
synthetic
synthetic
synthetic
synthetic
synthetic anatomies
synthetic biological circuits
synthetic biological systems
Synthetic biology		Synthetic biology	1
synthetic biology
Synthetic biology
Synthetic biology
Synthetic biology
Synthetic biology
Synthetic biology
synthetic biology
Synthetic biology
synthetic biology
Synthetic biology
Synthetic biology
Synthetic biology
Synthetic biology
synthetic biology
Synthetic biology
synthetic biology
Synthetic biology
Synthetic biology
Synthetic biology
synthetic biology
Synthetic Biology
synthetic biology
Synthetic biology
synthetic biology
Synthetic biology
Synthetic biology
Synthetic biology
Synthetic biology
Synthetic biology
Synthetic biology
Synthetic biology
Synthetic biology
Synthetic biology
Synthetic biology
synthetic biology
Synthetic biology
synthetic biology
synthetic biology
synthetic biology
Synthetic biology
synthetic biology
synthetic biology
Synthetic biology
synthetic biology
synthetic biology
synthetic biology
Synthetic biology
synthetic biology
Synthetic biology
synthetic biology
synthetic biology
synthetic biology
synthetic biology
synthetic biology
synthetic biology
Synthetic biology
synthetic biology
synthetic biology
Synthetic biology
Synthetic Biology
synthetic biology
synthetic biology
synthetic biology
synthetic biology
synthetic biology
synthetic biology
synthetic biology
synthetic biology
synthetic biology
Synthetic biology
synthetic biology
synthetic biology
synthetic biology
synthetic biology
synthetic biology
synthetic biology
Synthetic biology
synthetic biology
synthetic biology
Synthetic biology
Synthetic biology
synthetic biology
Synthetic biology
synthetic biology
synthetic biology
Synthetic biology
Synthetic Biology
Synthetic biology
synthetic biology
synthetic biology
synthetic biology
synthetic biology
synthetic biology
Synthetic biology
synthetic biology
synthetic biology
synthetic biology
synthetic biology
synthetic biology
synthetic biology
synthetic biology
synthetic biology
synthetic biology
synthetic biology
synthetic biology
synthetic biology
synthetic biology
synthetic biology industry
synthetic biology market
synthetic biology organizations
synthetic biology research trends
synthetic bugs
synthetic cells
synthetic circuit
synthetic communities
synthetic DNA
synthetic DNA circuits
synthetic DNA of concerns
synthetic eukaryotic genome
synthetic gene circuits
synthetic gene circuits
synthetic gene networks
synthetic genome
synthetic genome
synthetic genome		synthetic genome	1
synthetic genomes
synthetic genomics
Synthetic genomics
synthetic genomics
synthetic genomics
Synthetic life
synthetic living machines
synthetic living machines
synthetic method
Synthetic method
synthetic morphogenesis
synthetic route prediction
synthetic strains
synthetic virology
Synthetic yeast
synthetic yeast
synthetic yeast research
System biology
system control
systematic literature review
systematic review
systemic challenge
systems
systems
Systems biology		Systems biology	1
systems biology
systems biology
systems biology
systems biology
Systems biology
taxation
taxonomy
taxonomy of synthetic models
Technical Expertise Required
techno-political trends
technofix
technological competence
Technological convergence
technological futures
technological innovation
technology
technology & innovation studies
technology advancement
technology and society
technology assessment
technology commercialization		Technology	1
technology frameworks
technology modernization
technology monopolies
Technology of compliance
technology optimism
technology platforms
technology policy
technology readiness levels
technology risk
technology stack
technoscience
TECNOx
temporality
testing
text generation
text mining
the London Biofoundry
therapeutic function
therapeutics
threat intelligence
threats
threats to species diversity
timeline
tips
tissue microarray
tissue segmentation
tissue-based robots
tool
tool-use proficiency		Tools	1
tools
tools
tools
top-dow
top-down governance
topological data analysis
toxic compounds
toxic molecules
toxins
toxins
traceability
training set
transcription
transcriptomics
transfer learning
transformation
transformer
transition
Translation
translation
triage
troubleshooting
trustworthy AI
Tucker Framework
Tucker-Koblentz framework
Twist Bioscience
U.S. biosafety
U.S. National Science Advisory Board for Biosecurity (NSABB)
UK
UK		UK	1
UK
UK
uncertainty
Uncertainty quantification
Uncertainty quantification
unexpected outcomes
United Nations
US economy
USA
USA		USA	1
USA
USA
USA
user-friendly interfaces
value chain policies
viral engineering for gene therapy
viral engineering for vaccine design
viral genomes
viral pathogens
virtual screening
vision
vulnerabilities
waste management
waste treatment
wastewater
watermarking
web browsing
Web of Science Core Collection (WoSCC)
wetware codesign
WHO
wildlife virus discovery
Work
work of the future
workers
workers rights
workflow
workflow optimization
workflows		Workflows	1
workflows
world’ greatest challenges
worldbuilding
xenobiology		Xenobiology	1
xenobiology
xenobiology
xenobot			81
Yarrowia lipolytica
yeast research

## Sheet: Clusters
Broad categories	Clusters
AI
Artificial intelligence	Artificial intelligence
Automation
Biocontainment
Bioeconomy
Bioethics
Biofoundries
bioinformatics
Biological risk
Biology
Biomanufacturing
biomaterials
Biorisk
Biosafety
Biosecurity
Biotechnology
catastrophic risk
chatGPT
China
computational biology
conservation
Convergence
CRISPR
Deep learning
Design-Build-Test-Learn (DTBL)
Diseases
DiY laboratories
DNA synthesis
Drug discovery
Dual Use Research of Concern (DURC)
Dual-use
Emerging technologies
Engineering biology
Environmental risks
Ethics
fermentation
Foresight
gene drives
Gene editing
Generative AI
genetic circuits
Genetic engineering
Governance
GPT-4
iGEM
industrial biotechnology
innovation
Large language models (LLMs)
LLMs
Machine learning
Materials
Metabolic engineering
Molecular biology
multi-omics
national security
Open science
pandemics
Pathogens
Policy
Proteins
public policy
Regulation
Research
Responsible Research and Innovation (RRI)
Risk assessment
Science
science and technology studies (STS)
security
self-assembly
standardization
Sustainability
Synbio
Synthetic biology
synthetic genome
Systems biology
Technology
Tools
UK
USA
Workflows
Xenobiology

## Sheet: Deduped
(bio)risk assessment
abuse of biological weapons
active medical devices
actuator data
adaptive regulation
adaptive risk management
adverse health effects
Ageing
aggravation of species with complex gene modifications
AGI
agriculture
AI
AI assistants
AI benchmarks
AI dependence
AI ethics
AI for health
AI governance
AI guardrails
AI in Animal biotechnology
AI in bioinformatics
AI in cancer
AI in forest biotechnology
AI in healthcare
AI in life science
AI in medical biotechnology
AI in medicine
AI in oncology
AI in precision oncology
AI in radiomics
AI in science
AI methods
AI rational design
AI revolutions
AI system
AI systems
AI tools
AI trustworthiness
AI-assisted workflows
AI-bio capabilities
AI-enabled engineering
AI-enabled tools for the life sciences
AI-optimization algorithms
AI;
Algorithms
alignment
AlphaFold
Amyris
and innovation (STI) policy
and man-made mutations
and pharmacogenomics
and social implications
and social issue (ELSI)
animal
anthrax
anthropocene
Anthropology
anti-commons crisis
anti-infective drug discovery. Reverse vaccinology
antibiotic resistance
antibiotic resistance genes (ARGs)
antimicrobial resistance
applicability domain
applications
applied computing
applied microbiology
applied science
Argonaute
artificial
artificial cell
artificial cell factories
Artificial General Intelligence
Artificial Intelligence
Artificial intelligence (AI)
Artificial intelligence in medicine
artificial intelligence; AstraZeneca
artificial intelligent (AI)
artificial life
artificial neural network
artificial technology
Artificial-natural
Asilomar
assessment schemes
Assisted evolution
assisted synthetic biology
associative learning
AstraZeneca
augmentation
Augmented human intelligence
Australia Group
Automated Recommendation Tool (ART)
Automation
automation studies
autonomous decision-making
autonomous drug designing
autonomous living machines
autopoiesis;
auxotrophy
Bacteria
bacteria-based cancer immunotherapy (BCiT)
bacterial artificial chromosomes (BACs)
bad actors
barcoding
barriers
Barriers to success
basic science
Bayesian inference
BCiT
benevolence
bibliometric
Bibliometric analysis
bibliometrics
bio-artificial intelligence (BI)
bio-based industrial setup
bio-based industry
Bio-based production
bio-capitalism
Bio-hacking
bio-informational future
bioagents
biochemists
biocircuits
biocommodities
biocompatibility
Biocontainment
biocyborg
biodegradation
Biodesign
biodesign automation
biodesign rules
biodiesel
biodiversity
Bioeconomy
bioelectrics
bioelectronics
bioengineering
Bioengineering and biotechnology
bioengineering;
bioethanol
bioethical concerns
Bioethics
Biofoundries
biofoundry
biofuels
biogenesis
BioGPT
biohacking
biohybrid robotics
biohybrid;
bioinformatics
bioinformation
bioinformational dilemma
Bioinformational diplomacy
bioinformational secrecy
biological agent
biological agents
Biological and Toxin Weapons Convention (BWC)
biological catastrophe
biological design tools (BDTs)
Biological diversity
Biological engineering
biological material
biological misuse
biological networks
Biological risk
biological risks
Biological sciences
biological sensing
biological simulators
biological system responses
biological systems
biological weapons
Biological Weapons Development
biologics
biologists
biologization
biology
biology;
Biomanufacturing
biomarker recognition
Biomarkers
Biomaterial
biomaterials
biomedical AI assistants
biomedical applications
biomedical datasets
Biomedical engineering
biomedical information
biomedical literature
biomedical ML systems
biomedicine
biomimetics
biomimicry
biomodification
Biomodifying technologies
bioorganic chemistry
bioparts
biopharma
biopharma industry
biopharmaceuticals
Biopolitics
bioprinting
bioprocessing
Bioproducts
Bioremediation
Biorisk
biorisks
biorobot;
biosafety
biosafety and bioethics
biosafety governance
Biosafety risks
biosafety standardization
biosafety standards
bioscience
Biosecurity
biosecurity procedures
Biosecurity risk
biosecurity risks
biosecurity safety level (BSL)
biosensing
biosensor
biosurveillance
biosystem
biotech
Biotechnology
biotechnology debates
biotechnology industry
biotechnology products
biotechnology regulation
biotechnology sector
bioterrorism
biothreats
Biowarfare
bioweapons
book review
bottom-up
bottom-up strategies
botulinum toxin
BSL requirements
business models
Cancer
Cancer microenvironment
Cancer prevention
cap;
carbon sequestration
Cartagena Protocol on Biosafety
case study
catastrophic risk
catastrophic risk;
catastrophic risks
CDC
Cell encapsulation
cell engineering
cell factories
Cell metabolism
cell signaling
cell therapy
cell-free approaches
cell-free synthetic biology
Cell-free systems (CFS)
cells as products
cells;
centralized production
certainty-of-containment
challenges
chassis cell
chatGPT
chemical
chemical engineers
chemistry
chemistry automation
chimerism
China
Circuits
Circular economy
citizens
civil society
classroom
cleanup data
climate breakdown
climate change
climate resilience
clinical workflow
cloud laboratories
Clustered Regularly Interspaced Short Palindromic Repeats (CRISPR-Cas)
CO2 fixation pathway
CO2 sequestration
Code of conduct
coding
collaboration
combinatorial systems
commercial process validation
commercial risks
communication
competition
Complex adaptive systems
complex living systems
complexities
compliance
compound libraries
computational biology
Computational biology and bioinformatics
computational scientists
computer
Computer modelling
computer-aided design
computing methodologies
concerns
conservation
conservationist synthetic biology
conservationists
consilience
Construction File (CF) specification
consultation
containment
Context understanding
control
controversies
Convention on Biological Diversity (CBD)
Convergence
convergence literature
conversation with chatGPT
Conversational AI
core promoter
coupling transition theory
COVID-19
creative outcomes
CRISPR
CRISPR-Cas
criteria of relevance
critical geography
critique
crop yield
crosspharma datasets
cultural risks
curiosity-based system
cyberbiosecurity
cyborg
cyborg;
dangerous bioagents
data analysis
Data integration
data mining
data science
Data sharing
databases
de novo design
de-extinct species
decentralized governance architectures
Decision analysis
decision-making
Deep learning
deep learning and machine learning
DeepMind
DEI
democratization
democratized access
deregulation
Design fiction
design on living cells
design-build-test cycle
design-build-test systems
design-build-test-learn (DBTL) cycle
Design-Build-Test-Learn (DTBL)
Design–Build–Test–Learn cycle
designer genes
designer genomes
designer yeasts
Desorptive capacity
developmental
digital economy
digital infrastructure
digital innovation
digital minds
digital revolution
digital sequence information
Digital Transformation
digital twins
Digital twins FDA
digital-enabled transformation
Digitalization
diplomacy
direct market intervention
disciplines
discovery
disease biology
disease diagnostics
disease pathogenesis
Diseases
Disruptive research
disruptive technologies
disruptive technology
dissociation
Diversity
DIY
DIY activities
DIY BIO
DIY innovation
DiY laboratories
DIY-biology
DIYbio
DNA
DNA biofoundries
DNA steganography
DNA storage
DNA synthesis
DNA technology
Do-it-yourself
Do-It-Yourself biology
Do-It-Yourself laboratory (DIY)
Drosha
Drosophila
Drug delivery
drug design
drug development
drug development challenges
drug discovery
drug research and development
drug safety
drug-design
Drugs
dual use
dual use research
Dual Use Research of Concern (DURC)
Dual Use Research of Concern (DURC) framework
Dual-use
dual-use capabilities
dual-use device
dual-use policy CRISPR/Cas9
dual-use research of concern (DURC)
dual-use research of concern (DURC). Legislation
dual-use systems
dual-use technologies
Dual-usescience
DURC
dynamic guidance
E. coli
ecological restoration
ecological restoration technologies
ecological risks
ecological sustainability
ecology
Economics; Science
Ecosystem emergence
education
efficiency
electrical engineers
electronics
ELSI
ELSI/A
embryo;
emergencies
emergent self-organization
emerging biotechnologies
Emerging technologies
Emerging technology
emerging technology domains
Enabling technologies
Endocrine-disrupting chemicals (EDCs)
energy security
engineer prompts
engineered biological systems
engineered biology
engineered cell
engineered cells
engineered enzymes
engineered genetic circuits
engineered live therapeutics
Engineered living materials
engineered microorganisms
engineered pathogens
engineering
Engineering biology
engineering framework
engineers
Entrepreneurial ecosystems
entrepreneurial leadership
Entrepreneurship
Environmental biotechnology
environmental engineering
environmental engineers
environmental metagenomics
environmental proliferation
environmental risk assessment (ERA)
Environmental risks
environmentalists
enzyme design
epidemiology
epistemic cultures
epistemology
epistemology of synthetic models
equity and inclusion
ethical
Ethical framework
ethical governance
Ethics
ethics education
ethics frame
ethics of synthetic biology
ethnography
EU
EU FP7
EU Framework Programme for Research and Innovation
Europe
European Bioinformatics Institute (EBI)
evolution;
evolutionary cell biology
Executive order
existential risk
experiment automation
experimental approaches
experimental structural biology
experiments
experiments of concern
explainable ML
exploration & exploitation
export controls
External technology commercialisation (ETC)
FDCA
feature selection
Federated learning
feedback control
fermentation
fermentation scale-up
fermentation technology
Fink report
Food industry
food security
food-related substances
Forbidden knowledge
Foresight
forestry
Foundation models
foundational technologies
foundry
fragmentation of biology
framing
functional and structural genomics
functional genomics
fundamental abilities
fundamental design principles
future
future of work
future perspectives
future trends and developments
Futures studies
futurist
GAIA
gain-of-function
gain-of-function (GOF)
gas fermentation
gene circuit
gene circuits
gene drive
gene drives
gene editing
Gene expression
gene expression optimization
gene networks
gene therapy
gene-drive technology
GeneGPT
generally regarded as safe (GRAS)
Generative AI
Generative artificial intelligence
Generative models
generative pre-trained language model
genetic biocontainment systems
genetic circuits
genetic engineering
genetic engineering tools
Genetic firewall
genetic implant
Genetic safeguard
genetic safeguards
genetic variants
genetically engineered cells
genetically engineered microbes (GEMs)
Genetically modified organisms (GMOs)
genetically programmable tools
Genetics
genome annotation
genome foundries
genome minimization
genome synthesis and assembly
Genome-editing
Genomics
Gingko Bioworks
Ginkgo Bioworks
Global Biofoundries Alliance (GBA)
global challenges
global forum
global governance
Global issue
global observatory model
global public health
global public health emergencies
global warming
GM
GMO
GMO regulation
GMOs
governance
governance continuum
governance of emerging technologies
Governance regulation
governance strategies
Governance systems
GPT
GPT-4
Graph neural networks
groups of concern
gut microbiome
Hazardous Biological Materials
Health care
Health services
health surveillance
healthcare
high-throughput equipment
high-throughput phenotyping
high-value commodities
Hill equation
history
history of science
holistic understanding
homo sapiens
Horizon 2020
hotspots
human being
human diseases
Human enhancement
human gene editing
human genomics
Human health
human intelligence
human intervention
human species
human trust
Human-AI interfaces
human-driven design
hybridity
hydrogen production
iGEM
immunotherapy
impact
implantables
implants
implementation
in vitro platforms
induced pluripotent stem cells
industrial biomanufacturing
industrial biotechnology
industrial manufacturing
industrialization
industry
industry policy
industry-driven approach
infection biology
infectious disease
information extraction
Information management
information science
information security
information;
innovation
innovation diffusion
innovation governance
Innovation intermediaries
Innovation studies
Innovation types
Intellectual property
Intellectual property rights
intelligence;
intelligent machines
Intelligent medicine
intentional misappropriation
Interactive materials
interdisciplinarity
International collaboration
International Gene Synthesis Consortium (IGSC)
international genetically engineered machine competition
International Genetically Engineered Machine competition (iGEM)
international law
international organization for standardization (ISO)
interview data
interviews
IP rights
IPCC
Israel
key enabling technologies
Keywords
lab constructed genetic material
lab escape
lab security measures
lab-grown meat
Labor
laboratories
laboratory leaks
laboratory safety
laboratory technicians
laboratory work
labs
laissez-faire
laissez-faire governance
land usage
Language modelGPT-3.5
large language model (LLM)
Large language models
large language models (LLMs)
large-scale genetic designs
Latin America
leadership
learning;
legal
legislative flexibility
lessons learned
Licensing
life and medical sciences
Life patenting
life science
life;
lifelong learning
literature mining
literature review
living
living modified organisms
living sensors
living therapeutics
living therapies
LLM chatbots
LLMs
logic gates
M&A
machine
machine intelligence
Machine learning
machine learning (ML)
Machine learning algorithms
machine-generated examples
machines
MAGE
maintenance
malicious actors
management innovation
management of dual-use virological research
mandated production
manufacturing
manufacturing revolution
Map of science
marine resources
marketplace
mass misinformation campaigns
materials design
materials discovery
materials sciences
mathematical modelling
mathematicians
mechanistic modeling
media frames
medical applications
medical education
medical imaging diagnostics
medical knowledge
Medical research
medicine
MELLODY
meso-scale morpogenesis
meta-frames
Metabolic engineering
metabolic engineers
Metabolic networks
metabolic pathways
metabolomics
metagenome
Metagenomics
method development
microalgae
microbial cell factories
Microbial ecology
microbial production
microbiologists
Microbiome
microbiome research
microorganism bots
microorganisms
microRNA
minimal genome
minimising the downsides
miRNA prioritization
miRNA regulation
MIT
MIT Foundry
mitigation
mitigation regimes
ML
ML model misuse
model-driven design
modular cell therapy technologies
modular laboratory equipment
modularity
modularization
Molecular biology
molecular circuits
molecular de novo generation
molecular docking
Molecular dynamics simulation
molecular engineering
molecular evolution
molecular genetics
Molecule representation
morphogenesis
mRNA vaccines
mRNA-based therapeutics
multi-modality handling
multi-omics
multi-omics datasets
multi-scale machines
multimodal
multimodal deep generative models
multimodality
multinational corporations
multiple realizability
multiplex automated genome engineering (MAGE)
Nagoya Protocol on Access and Benefit Sharing
nano-scale materials
nanobiotechnology
Nanomaterials
Nanotechnology
NASEM Framework
national approaches
national law
National Science Advisory Board For Biosecurity (NSABB)
national security
National Security Advisory Board for Biosecurity (NSABB)
NATO
Natural language processing
natural language processing (NLP)
Nature 4.0
Negative Emissions Technologies (NETs)
negative side-effects
NEST-ethics
network biology
neural networks
new life
Next generation
NIH
NIOSH
NLP
non-Darwinian human evolution
non-natural biosynthesis pathways
non-state actors
non-state organizations
nondimensionalisation
nuclear war
nutraceutical
OECD
of
off-the-shelf bioparts
office automation
online misinformation
open access
open science
open technology sharing
Open-source biotechnology
OpenAI
operational ecologies
optimization
optogenetics
overloading
oversight
overspecialization
pan-genome
pandemic
pandemic control strategies. Governance
pandemic-class agents
pandemics
participant safety
participatory governance
pathogen
Pathogens
pathway analysis
pathway optimization
pathways
patient care
Pavlov’s dog
personhood
pest control
pharma
pharmacodynamics
pharmacogenetics
pharmacokinetics
pharmacology
philosophy
physical computing
plant metabolites
playing God
PloS
plug-and-play
policy
policy implications
policy instruments
policy problems
policy process
policy recommendations
policy reset
policy. Flourishing
political ecology
political economy
politics
polycomputing
positive network externalities
potential misusers
practical solutions
Practice
practitioners
precautionary approach
Precautionary principle
precision maladies
precision medicine
precursor behaviors
predictive models
preemptive strategy
preparedness
prevention-through-design principles
preventive approach
Principal component analysis
proactive risk management
probiotics
problem solving protocol
process engineering
product prototyping
productivity
products
programmable living materials
prompt engineering
property predictions
protein design
protein engineering
protein fold predictions
protein folding
protein function
protein language models
protein structure prediction
protein synthesis
protein-protein interactions (PPIs)
proteomics
Pseudomonas putida
Public biofoundries
public dialogue
public discourse
public engagement
public expectations
public funding
Public health
public health emergency response system
public interest
public policy
public safety
public understanding of science and technology
Publication norms
PubMed
Python
QbD
QSAR
QSPR
quality control
Quantitative Structure Activity Relationship (QSAR) models
Quantitative synthetic biology
radical/disruptive innovation
random forest model
re-create nature
real-world problems
reasoning
recombinant DNA
recombinant DNA technology
recreating pathogens
red-teaming
reengineering of nature
reflexive risk management
reflexivity
regenerative medicine
regulation
regulation and legislation
Regulation and management
Regulations
regulatory circuits
Regulatory considerations
regulatory flexibility
regulatory frameworks
regulatory space
reinforcement
Reinforcement learning
reintegration
remediation
renewable carbon strategy
renewable energy source
reprogramming living cells
Research and Innovation (R & I)
Research challenges
research gaps
research governance
research of concern
Research sponsors
Responsibility
responsible agroecology
responsible AI
Responsible Innovation
Responsible innovation (RI)
Responsible research and innovation
Responsible Research and Innovation (RRI)
responsible research innovation
resurrecting extinct species
reverse genetics
review
RI
RI institutionalization
risk
risk analysis and technology
Risk assessment
risk assessments
Risk ethics
risk frame
risk governance
risk landscape
Risk management
risk mitigation
risk perception
risks
RNA biology
RNA polymerase II
RNA structure prediction
RNA-based tools
RNAi
roadmap
roadmapping
robot
robot;
robotic cloud laboratories
robotic infrastructure
robotics
RoseTTAfold
S. typhimurium
Saccharomyces cerevisiae
safety
safety by design
safety research
safety-by-design
Safety-by-designs
sandboxed environments
sapient AIs
sapient beings
scale-up
scale-up facilities
scenario
Scenario visualization
science
Science & technology and innovation policy studies
science and society
Science and technology studies
science and technology studies (STS)
Science Citation Index Expanded
science frame
science policy
Science technology and innovation (STI)
science;
scientific findings
scientific method
Scientific Reports
scientists
scientometry
Search strategy
security
security dilemma
security governance
security risks
self-assembled nanoparticles
self-assembly
self-driving labs (SDLs)
self-experimentation
self-governance
self-governance mechanisms
self-regulatory approach
semantic
semantic containment
Senescence
sensor data
sequence screening
shared responsibility
signaling motifs
SimulateGPT
skilled work
smart living materials
Smart materials
social context
social engagement
social practices
social progress
social progress frame
social sciences
societal governance
Sociocultural and cognitive factors
sociotechnical imaginaries
software
Source
South America
Space missions
Space settlement
sperm-bots
stakeholder engagement
stakeholders
standard
standardization
standardized biological building blocks
standardized metrics
standards
startups
state types
statistical learning model
statistical models
statisticians
statistics
stewardship
stewardship governance
STI policy
Stimulus-responsive materials
strain engineering
structural biology
Structural topic model
STS
STS in policy
STS researchers
students
Suggestion
suicide genes
summarization
super-enhancer
supernumerary neochromosome
Survey
sustainability
sustainability challenges
Sustainability-oriented innovation
SynB
Synbio
synbio applications
synbio chassis
synbio governance
synbio hype
synbio products
synbio safety
Synergene
synthetic
synthetic anatomies
synthetic biological circuits
synthetic biological systems
Synthetic biology
synthetic biology industry
synthetic biology market
synthetic biology organizations
synthetic biology research trends
synthetic bugs
synthetic cells
synthetic circuit
synthetic communities
synthetic DNA
synthetic DNA circuits
synthetic DNA of concerns
synthetic eukaryotic genome
synthetic gene circuits
synthetic gene networks
synthetic genome
synthetic genomes
synthetic genomics
Synthetic life
synthetic living machines
synthetic method
synthetic morphogenesis
synthetic route prediction
synthetic strains
synthetic virology
Synthetic yeast
synthetic yeast research
System biology
system control
systematic literature review
systematic review
systemic challenge
systems
Systems biology
taxation
taxonomy
taxonomy of synthetic models
Technical Expertise Required
techno-political trends
technofix
technological competence
Technological convergence
technological futures
technological innovation
technology
technology & innovation studies
technology advancement
technology and society
technology assessment
technology commercialization
technology frameworks
technology modernization
technology monopolies
Technology of compliance
technology optimism
technology platforms
technology policy
technology readiness levels
technology risk
technology stack
technoscience
TECNOx
temporality
testing
text generation
text mining
the London Biofoundry
therapeutic function
therapeutics
threat intelligence
threats
threats to species diversity
timeline
tips
tissue microarray
tissue segmentation
tissue-based robots
tool
tool-use proficiency
tools
top-dow
top-down governance
topological data analysis
toxic compounds
toxic molecules
toxins
traceability
training set
transcription
transcriptomics
transfer learning
transformation
transformer
transition
Translation
triage
troubleshooting
trustworthy AI
Tucker Framework
Tucker-Koblentz framework
Twist Bioscience
U.S. biosafety
U.S. National Science Advisory Board for Biosecurity (NSABB)
UK
uncertainty
Uncertainty quantification
unexpected outcomes
United Nations
US economy
USA
user-friendly interfaces
value chain policies
viral engineering for gene therapy
viral engineering for vaccine design
viral genomes
viral pathogens
virtual screening
vision
vulnerabilities
waste management
waste treatment
wastewater
watermarking
web browsing
Web of Science Core Collection (WoSCC)
wetware codesign
WHO
wildlife virus discovery
Work
work of the future
workers
workers rights
workflow
workflow optimization
workflows
world’ greatest challenges
worldbuilding
xenobiology
xenobot
Yarrowia lipolytica
yeast research
